# Supplementary material for: Heterogeneity and Chemical Reactivity of the Remote Troposphere defined by Aircraft Measurements
Source: Copernicus journal article supplement (doi:10.5194/acp-2021-405), 2021-05-19
Supplement: Supplementary file 1 [file acp-2021-405-supplement.pdf]

## Supplementary Information for

### Heterogeneity and Chemical Reactivity of the Remote Troposphere defined by Aircraft Measurements

Results from the NASA Atmospheric Tomography mission (ATom)

Hao Guo<sup>1</sup>, Clare M. Flynn<sup>2</sup>, Michael J. Prather<sup>1</sup>, Sarah A. Strode<sup>3</sup>, Stephen D. Steenrod<sup>3</sup>, Louisa Emmons<sup>4</sup>, Forrest Lacey<sup>4,5</sup>, Jean-Francois Lamarque<sup>4</sup>, Arlene M. Fiore<sup>6</sup>, Gus Correa<sup>6</sup>, Lee T. Murray<sup>7</sup>, Glenn M. Wolfe<sup>3,8</sup>, Jason M. St. Clair<sup>3,8</sup>, Michelle Kim<sup>9</sup>, John Crounse<sup>10</sup>, Glenn Diskin<sup>10</sup>, Joshua DiGangi<sup>10</sup>, Bruce C. Daube<sup>11,12</sup>, Roisin Commane<sup>11,12</sup>, Kathryn McKain<sup>13,14</sup>, Jeff Peischl<sup>14,15</sup>, Thomas B. Ryerson<sup>13,15</sup>, Chelsea Thompson<sup>13</sup>, Thomas F. Hanisco<sup>3</sup>, Donald Blake<sup>16</sup>, Nicola J. Blake<sup>16</sup>, Eric C. Apel<sup>4</sup>, Rebecca S. Hornbrook<sup>4</sup>, James W. Elkins<sup>14</sup>, Eric J. Hints<sup>13,14</sup>, Fred L. Moore<sup>13,14</sup>, Steven Wofsy<sup>11</sup>

<sup>1</sup> Department of Earth System Science, University of California, Irvine, CA 92697

<sup>2</sup> Department of Meteorology, Stockholm University, Stockholm SE-106 91, Sweden

<sup>3</sup> Atmospheric Chemistry and Dynamics Laboratory, NASA Goddard Space Flight Center, Greenbelt, MD 20771

<sup>4</sup> Atmospheric Chemistry Observations and Modeling Laboratory, National Center for Atmospheric Research, Boulder, CO 80301

<sup>5</sup> Department of Mechanical Engineering, University of Colorado, Boulder, CO 80309

<sup>6</sup> Department of Earth and Environmental Sciences and Lamont-Doherty Earth Observatory, Columbia University, Palisades, NY 10964

<sup>7</sup> Department of Earth and Environmental Sciences, University of Rochester, Rochester, NY 14611

<sup>8</sup> Joint Center for Earth Systems Technology, University of Maryland, Baltimore County, Baltimore, MD 21228

<sup>9</sup> Department of Geological and Planetary Sciences, California Institute of Technology, Pasadena, CA 91125

<sup>10</sup> Atmospheric Composition, NASA Langley Research Center, Hampton VA 23666

<sup>11</sup> John A. Paulson School of Engineering and Applied Sciences, Harvard University, Cambridge, MA 02138

<sup>12</sup> Department of Earth and Planetary Sciences, Harvard University, Cambridge, MA 02138

<sup>13</sup> Cooperative Institute for Research in Environmental Sciences, University of Colorado, Boulder, CO 80309

<sup>14</sup> Global Monitoring Division, Earth System Research Laboratory, NOAA, Boulder, CO 80305

<sup>15</sup> Chemical Sciences Division, National Oceanic and Atmospheric Administration Earth System Research Laboratory, Boulder, CO 80305

<sup>16</sup> Department of Chemistry, University of California, Irvine, CA 92697

Correspondence to: Hao Guo ([haog2@uci.edu](mailto:haog2@uci.edu)) and Michael J. Prather ([mprather@uci.edu](mailto:mprather@uci.edu)).

## S.1. The Modeling Data Stream

The ATom mission was designed to collect a multi-species, detailed chemical climatology that documents the patterns of physical and chemical heterogeneity throughout the remote troposphere. The work here requires a complete set of key species in each air parcel to initialize global 3D chemistry models to be able to calculate the CH<sub>4</sub> and O<sub>3</sub> reactivities over a 24 hour cycle. The ATom Modeling Data Stream (MDS) provides a semi-continuous set of 10 s air parcels with a full set of values for the key chemical reactants and conditions. We choose 10 s averages for our air parcels as a compromise to include most of the instruments, and because the 10 s merged data is a standard product (Wofsy et al., 2018). Some of our core species are measured with gas chromatographs or flask samples with longer integrations times (30-90 sec), but these can be mapped onto the 10 s parcels with loss of the higher frequency variability found in the 10 s measurements. The frequent profiling of the DC-8 gives us both vertical and horizontal scales: the vertical extent of a 10 s parcel is 50 - 110 m (55%-95% of all parcels, with <50% having near level flight) and the horizontal extent is typically 1.4 - 2.5 km (10%-90% of all parcels).

ATom completed its four deployments: ATom-1 starting 20160729 (YYMMDD), ATom-2 starting 20170126, ATom-3 starting 20170928, and ATom-4 starting 20180424. ATom targets the remote troposphere by sampling over the middle of the Pacific and Atlantic Ocean basins. The DC-8 aircraft performed in situ profiling of the atmosphere from 0.2 km to 12 km along each flight segment as often as possible. Each deployment lasted about 4 weeks and contained 11 to 13 research flights (RF). Figure S1 maps the RF, and the Table S1 summarizes each flight in terms of airports, starting date (UT), and number of 10 s parcels. For convenience, we designate the RF across the 4 deployments as ATom flights (AF) 1 through 48. The MDS data reported here consist of 149,133 air parcels over 4 deployments with a total of 48 research flights. AF 46 is a short ferry flight from Kangerlussuaq, Greenland to Bangor, Maine with many instruments turned off and no profiling, thus these 1,106 parcels contain only flight data (MDS variables 1:11) and no chemical data.

ATom sampling of the troposphere is more uniform than most aircraft missions, but still contains some biases that can be adjusted by weighting each air parcel. Due to the typical profiling sequence (level at cruising attitude for 10 min, descent for 20 min, level flight about 160 m above the sea level for 5 min, and a 20-min climb back to cruising altitude) and to the occasional requirements of weather or air traffic control, the sampling is skewed towards the uppermost troposphere ( $P < 300$  hPa) and, secondly, the marine boundary layer. We designate a weight for each MDS air parcel to achieve a more uniform sampling of the troposphere by mass: data are binned into 100 hPa-wide pressure bins and 10°-wide latitude bins, and each point is assigned a weight equal to the inverse of the number of points in the bin times cosine of the latitude. There are very few measurements for pressures <200 hPa and so these points are included in the uppermost 200-300 hPa bin. This ATom-1 analysis has three study domains: Global includes all parcels (32,383) weighted as above; Pacific considers all measurements (11,486) over the Pacific Ocean from 54°S to 60°N (research flights RF 1,3,4,5,6); and the Atlantic,

likewise, from 54°S to 60°N (RF 7, 8, 9) over the Atlantic basin (7,501). The ATom-1 flight tracks shown in Figure S1 identify the Pacific and Atlantic domains with very thick lines. Also shown are the regional blocks used to calculate the model climatologies for those domains.

Figure S2a shows the time series of O<sub>3</sub> and H<sub>2</sub>O measured during one of the profiles of RF 3. The 1 s data is plotted along with the 10 s averages. Most of the heterogeneity including correlated variability is caught with the 10 s parcels. For RF #3, the root mean square error (RMSE) of the 10 s averages linearly interpolated to 1 sec is 6% for H<sub>2</sub>O and 3% for O<sub>3</sub>. For comparison the short-gap interpolation described below has an RMSE twice as large for these species.

The problem in developing the MDS from the 10 s merge files is that gaps occur in individual species on a range of times scales due to calibration cycles, sampling rates, and instrument malfunction. For the chemistry modeling of an air parcel, we need complete chemical specification and thus data gaps in individual species must be filled where we have adequate information. Early versions of the ATom-1 MDS were generated and used in modeling studies that are included here, but we found several problems with the approaches used for gap filling and had to entirely redo the method. MDS\_R0 adopted early recommendations for use of a photo-stationary steady-state value for NO<sub>x</sub> (PSS), which was later rejected by the ATom science team as flawed. MDS\_R1 reverted to the observed NO<sub>x</sub> values but had problems when using flask sample data with a lower limit of detection. Both of these MDS versions used CO and other species as a proxy for gap filling, but closer examination showed that this method lacks skill.

The MDS R2 method for gap filling is fully documented in this Supporting Information. MDS\_R2 defined the core reactive species (H<sub>2</sub>O, O<sub>3</sub>, CO, CH<sub>4</sub>, NO<sub>x</sub>, NO<sub>x</sub>PSS, HNO<sub>3</sub>, HNO<sub>4</sub>, PAN, CH<sub>2</sub>O, H<sub>2</sub>O<sub>2</sub>, CH<sub>3</sub>OOH, acetone, acetaldehyde, C<sub>2</sub>H<sub>6</sub>, C<sub>3</sub>H<sub>8</sub>, i-C<sub>4</sub>H<sub>10</sub>, n-C<sub>4</sub>H<sub>10</sub>, alkanes, C<sub>2</sub>H<sub>4</sub>, alkenes, C<sub>2</sub>H<sub>2</sub>, C<sub>5</sub>H<sub>8</sub>, benzene, toluene, xylene, CH<sub>3</sub>ONO<sub>2</sub>, C<sub>2</sub>H<sub>5</sub>ONO<sub>2</sub>, RONO<sub>2</sub>, CH<sub>3</sub>OH) and corollary species indicative of pollution or processing (HCN, CH<sub>3</sub>CN, SF<sub>6</sub>, relative humidity, aerosol surface area (4 modes), and cloud indicator), see Table S2. Every species in each air parcel is now flagged so that the instrument is clearly identified (in the case that two instruments measure the same species) and the type of the gap filling (dependent on the length of the gap) is denoted so that the users can develop their own criteria for including, or not including, the gap-filled species. Flags 1 & 2 indicate a reported measurement from a primary (1) or secondary (2) instrument. Flag 3 means short-gap filling. Flags 4 & 6 indicate log-gap filling for tropospheric and stratospheric parcels, respectively. Flag 5 applies to missing flights with no data from that instrument(s), and these were filled by a multiple linear regression from the parallel flights. Flag 0 indicates not a number (NaN), which only occurs for AF 46.

### **S.1.1. Primary ATom data sets**

This section describes the creation of MDS revision R2; the early-release revisions R0 and R1 used a different algorithm and flagging system and should no longer be used. The 'Mor' data sets created by Wofsy et al. (2018) contain merges of the ATom 10 s data

(Mor.all), the WAS flask data analyzed post-flight (Mor.WAS.all) and the in-flight TOGA chromatograph-mass spectrometer data (Mor.TOGA.all). These data sets are released in a gzip file with the YYYY-MM-DD of their creation. For this MDS version (2020-05-27), we use the following 3 data sets:

'Mor.all.at1234.2020-05-27.tbl' (653,494,900 bytes)

'Mor.WAS.all.at1234.2020-05-27.tbl' (49,091,169 bytes)

'Mor.TOGA.all.at1234.2020-05-27.tbl' (80,579,206 bytes)

The Mor data are ASCII text files with extremely long records and difficult to read, containing a mix of comma-separated floating point, integer and character strings. For Mor.all, the 149133 records contain 675 comma-separated variables (but this can change with different releases). Some of the floating point variables are longer than 20 characters due to excess precision in the scientific notation. We pre-process these with a Fortran generic read(5,\*) using the comma separation to generate character strings. The code searches the title (first) record of the Mor...tbl to identify the specific columns that we need for MDS (in this case 39 out of 675). The 39 key data from each record are rewritten in formatted form (39a40, because some floating point variables were excessively long and 39a20 was inadequate) with comma separation. All numerical values are copied verbatim, but the text 'NA' is replaced by 'NaN'. This new file can be simply imported into Matlab or more easily read by other software. Further, this approach ensures that the correct quantities are pulled from the Mor...tbl file, even if the column order changes due to addition or removal of data. The WAS and TOGA observations have separate files with the start and end times of the observed air mass, which is greater than the 10s interval in the regular file. Both WAS & TOGA Mor...data sets have a large number of data columns (729 & 727) with fewer records (6,991 & 12,168, respectively).

The 3 Fortran output files are imported into Matlab (using 'Import Data') and then processed as described below. The instructions and Matlab code are included in text files containing Matlab commands: 'Pmat-Mor1.txt', 'Pmat-WAS+TOGA.txt', 'Pmat-MDS0n.txt').

### **S.1.2. Preliminary processing and identifying gaps**

In terms of critical flight data (time, latitude, longitude, altitude), there are no gaps in the record. UTC\_stop has a gap, but this variable is not used in the MDS (10s intervals are assumed).

The Mor.all.at1234.2020-05-27 data set of 149,133 10s parcels was sorted into deployments and research flights. The beginning and end points of each research flight (RF) along with the deployment and starting date of each flight are given in Table S1. All together there are 48 flights, but AF 46 contains only flight data. All three types of Mor data include some measurements close to the airports, which often have ground-level pollution. We remove these data by including only measurements at altitudes of 900 m or more above the takeoff/landing airport. The record collapses to 146,494 parcels, also shown in Table S1.

The list of MDS R2 variables, their MDS identifiers (ending in \_M) and the sources in standard ATom nomenclature are given in Table S2. The flag variables (0 to 6) are also explained there. Information about each research flight is summarized in **Table S3abcd**, including the average latitude, longitude and altitude of the 10s parcels (all equally weighted here). The abcd sub-tables correspond to the 4 deployments. For each of the MDS variables 12 to 50, The % of non-NaN values with flags = 1, 2 or 3, is shown (the remaining % has flags = 4, 5 or 6). These data correspond to a primary or secondary direct measurement (1 or 2) or else short-gap interpolation (3, see text below). Missing data for an entire flight (0%) has shaded cells.

**Mor.all combined species and fixes.** The primary MDS NO<sub>x</sub> values were created by simply summing NO<sub>CL</sub> + NO<sub>2</sub><sub>CL</sub> before any attempt to deal with the negative values. The number (27071) of NO<sub>x</sub> NaNs coincides with those of NO<sub>2</sub><sub>CL</sub>. The alternative photostationary state NO<sub>x</sub> values (NO<sub>x</sub>PSS) were calculated from O<sub>3</sub>, NO and J-values and was originally proposed as a more accurate value for NO<sub>x</sub>. Subsequent analysis has shown this approach is biased, and it is included here only for ATom-1 because some early model studies used it in the MDS R0 version. A small number (22) of CH<sub>4</sub><sub>QCLS</sub> values have unrealistic abundances <1000 ppb and these are converted to NaNs. The NaNs in these cases were filled using the algorithm below.

**TOGA and WAS combined species and immediate fixes.** Methyl and ethyl nitrate (WAS only) are kept separately but the 6 higher organo-nitrates are combined into RONO<sub>2</sub>; the limited TOGA organo-nitrates are not used. For both WAS and TOGA, toluene and ethylbenzene are combined into toluene, and the two forms of xylene are combined. Both forms of butane are kept, but higher alkanes are combined into 'Alkanes' for both TOGA and WAS. TOGA and WAS use -888 flags for LLOD and these are converted to 0.001 ppt because the LLOD values for these species (e.g., 3 ppt) are much higher than remote background values and setting them to the LLOD level would be misleading. TOGA's toluene has some mistaken values of 888 and 999 instead of -888 and -999 and these are corrected. All -999 values, as well as all gaps in either TOGA or WAS measurement intervals are converted to NaNs. The WAS and TOGA data have time stamps (stop minus start) much longer than the 10 sec parcels in the Mor.all data sets, and their values are mapped onto the 164,494 parcels whenever their start or stop time falls within the 10s start-stop range, else they are filled with NaNs. The WAS and TOGA instruments sample air averaged over typically 30 to 90 sec, and then have a gap before the next measurement, varying from 30 to 300 sec. The TOGA length-of-measurement is regular with the 10%-90%ile range being about 35 sec and the same percentile length-of-gaps being about 85 sec. The WAS data comes from flasks filled in flight, and the time to fill a flask depends on the pressure, and the gap depends on the operator decision: the 10%-90%ile length-of-measurement is 32 to 90 sec, and the corresponding gaps are 33 to 285 sec.

### S.1.3. Interpolation and fill of data gaps

The actions here are arbitrary but judicious, and every attempt was made to avoid introducing spurious data. There are a number of negative values for chemical variables that are intrinsically positive definite. Instrument reporting of a negative value is expected when the concentration is near the limit of detection or within the instrumental noise range. The MDS choice is simply to take all such values less than or equal to 0 and convert to 0.001. Since these negative values usually represent a small concentration close to the detection limit, they have little impact on the chemistry calculations using the MDS. If analyzing statistics near this range, the original Mor data sets should be used.

**Pressure and temperature.** P and T have 5 very small gaps of length ~6 (# of 10s parcels missing) plus a longer gap of length 28. All gaps occurred during smooth descent or ascent and so were filled using linear interpolation. These are denoted by `flag_M(:,10) = flag_M(:,11) = 3`.

**H<sub>2</sub>O and relative humidity.** There are a number of short gaps in the record of H<sub>2</sub>O\_DLH and RHw\_DLH, and only 2 longer gaps (length = 83 and 87). One of the long gaps occurs during descent as H<sub>2</sub>O jumps from 240 to 18,000 ppm. Thus we choose a linear in the log method for all H<sub>2</sub>O gaps, while a simply linear method is used to fill RHw gaps. These are denoted by `flag_M(:,12) = flag_M(:,13) = 3`.

**CO.** One task is the creation of a continuous CO record since that species has two well calibrated, nearly continuous measurements. CO can be used to check for unusual or polluted air during the gaps in other species. The primary CO data are from QCLS because it has higher precision and the secondary are from NOAA with a more continuous record but greater noise. This processing of the CO data was done with the full 149,133-parcel dataset, and not the airport-collapsed data set. For the MDS airport-truncated data set, the number of NaN points in CO\_NOAA is 8463; that in CO\_QCLS is 30,233.

1. Modify CO\_QCLS: interpolate short gaps in the CO\_QCLS record ( $\leq 10$  parcels = 100s ~ 1000 m vertically)
2. Create a continuous CO\_N record.
  - a. Start with CO\_NOAA and locate all the NaN gaps.
  - b. Fill gaps with modified CO\_QCLS where available and locate new NaN gaps.
  - c. Average CO for 5 points on either side of gap, interpolate linearly across the gaps.
3. Smooth the CO\_N record, which is visibly noisy at 10 s with 11-point running average (~ 1000 m in vertical).
4. Create a continuous CO record.
  - a. Define CO = modified CO\_QCLS (step 1).
  - b. Fill the gaps in CO with CO\_N (step 3).
  - c. Define CO flags:
    - 1 = primary, QCLS (116,261 parcels);
    - 2 = secondary, smoothed CO\_N (29428);
    - 3 = modified, short-interpolated QCLS (80);
    - 4 = interpolated CO\_N (725).

Two samples of this CO interpolation method are shown in Figure S3. The frequency of occurrence of all flags for this new CO\_M variable, along with the other MDS chemical variables are given in Table S4.

**Short-gap simple interpolation for remaining species.** It was decided that the least intrusive method for filling short data gaps was to simply interpolate using only the instrument data. In MDS revisions R0 and R1, CO was used as a proxy to fill these gaps, but later analysis showed little correlation with absolute CO or even the short-term variability in CO. We examined the typical size of gaps and their frequency. For the Mor.all species we selected gaps of  $\leq 13$  for short-gap interpolation; for WAS the gap frequency peaked about 10 (100 s) and we selected gaps of  $\leq 10$ ; for TOGA there was a strong peak at gap length of 7-8 (instrument cycle time) and we also selected  $\leq 10$  as the criterion. These gaps correspond to about 1000 m or less in the vertical during ascent or descent. For most Mor.all variables this adds about 10% (absolute) to the number of non-NaN parcels, but for WAS and TOGA with many smaller gaps it greatly enhances the coverage. WAS coverage goes from 28% to 41%, while TOGA jumps from 31% to 93% because most gaps are 85 sec. For all short-gap interpolation, the parcel data for that species is tagged with flag = 3.

**Long-gap interpolation for remaining species - Troposphere.** We choose a robust and minimally intrusive method for filling gaps  $> 10$  (100 s) based upon the average tropospheric profile for that flight, using eight 100-hPa-wide bins ( $< 300$ , 300-400, 400-500, 500-600, 600-700, 700-800, 800-900,  $> 900$  hPa). The gap value is replaced by the appropriate bin value. If any bins have no measured values, we use the nearest bin or average of the nearest bins. It is important not to confuse stratospheric and tropospheric air when gap filling. From our analysis, a number of key reactive species (e.g.,  $\text{CH}_2\text{O}$ ,  $\text{HOOH}$ ,  $\text{NO}_x$ ) show distinctly different patterns as ATom crosses into the stratosphere.

**Long-gap interpolation - Stratosphere.** We find the most robust definition of stratospheric-like air to be based primarily on  $\text{H}_2\text{O}$  rather than  $\text{O}_3$ , because  $\text{O}_3$  abundances  $> 200$  ppb are often seen in large, clearly tropospheric air masses with  $\text{H}_2\text{O} > 50$  ppm. Based on percentiles of  $\text{O}_3$  at different values of  $\text{H}_2\text{O}$  (see Figure S4a) we pick  $< 30$  ppm as the criteria for being stratospheric, with the secondary requirements that  $\text{O}_3 > 80$  ppb and  $\text{CO} < 120$  ppb (see Figure S4b). For the stratospheric air we create mean 'profiles' in terms of 6  $\text{O}_3$  bins ( $< 200$ , 200-300, 300-400, 400-500, 500-700,  $> 700$  ppb) use this as a lookup table for gap filling. There are many fewer stratospheric parcels, and the stratosphere tends to be similar across latitudes, and so we create a single lookup tables from all research flights at all latitudes. In general, these near tropopause air parcels are cold and dry and not highly reactive; however when partitioning the chemistry model calculated reactivities between stratosphere and troposphere, these criteria may need to be re-investigated.

As a measure of the error in this long-gap interpolation, we randomly select 10% of the air parcels from data stream before calculating the long-gap interpolation, interpolate those 10% points, and calculate the mean bias and root-mean-square error (rmse). This is repeated 10 times and we show the average results in Table S5 below. We find these results acceptable, and better than the multiple linear regressions we tried. There may be

a better way to do this in future versions beyond R2, perhaps with a machine-learning approach. Gaps interpolated in this way are given flag = 4 (troposphere tables) and flag = 6 (stratosphere tables).

**Missing data for an entire flight.** For **ATom-1 RF-5**, an instrument failed and we lost all data for H<sub>2</sub>O<sub>2</sub>\_M, HNO<sub>3</sub>\_M, and HNO<sub>4</sub>\_M. This flight was from American Samoa to Christ Church. We fill these species using a multiple linear regression from the parallel flights ATom-1 RF-4 and ATom-2/3/4 RF-4/5. The independent (explanatory) variables for the multiple linear regression for these missing flights are chosen to be pressure, noontime solar zenith angle and latitude (in that order). For H<sub>2</sub>O<sub>2</sub>\_M and HNO<sub>3</sub>\_M, we calculate the missing ATom-1 RF-5 data using the full set of parallel flights, but for HNO<sub>4</sub>\_M, we can use only ATom-1/2 flights (see Table S3 & S6). Data filled for missing flights are given flag = 5. For **ATom-2 RF-2**, we also lost all data for H<sub>2</sub>O<sub>2</sub>\_M, HNO<sub>3</sub>\_M, and HNO<sub>4</sub>\_M. In this case the regression is based on parallel flights ATom-2 RF-3 and ATom-1/3/4 RF-2/3 for H<sub>2</sub>O<sub>2</sub>\_M and HNO<sub>3</sub>\_M, but only ATom-2 RF-3 and ATom-1 RF-2/3 for HNO<sub>4</sub>\_M. For **ATom-3 RF-1**, we lost all data for NO<sub>x</sub>\_M. A multiple linear regression is based on parallel flights ATom-3 RF-2 and ATom-1/2/4 RF-1/2. For **ATom-3/4 all**, we lost all data for HNO<sub>4</sub>\_M, and the best we can do is base the regression on all HNO<sub>4</sub>\_M measurements (not filled as noted above) from ATom-1/2. This is clearly one of the weakest gap filled here, and users should be careful if key results depend HNO<sub>4</sub>\_M values for ATom-3/4. For **ATom-4 RF-5/6/7/8/9/12/13**, we lost all data for CH<sub>3</sub>OOH\_M. A multiple linear regression approach was based on data from the preceding RF-4 as well as the parallel research flights from the other 3 deployments (i.e., ATom-1/2 RF-5 to 11, ATom-3 RF-5 to 13, ATom-4 RF-4). For **ATom-4 RF-11** (AF 46), all chemical data have flag = 0, value = NaN. A summary of the missing flights and species along with estimated error in our gap filling is given in Table S6.

From the reactivity results for ATom-1 shown in this paper, the lack of ATom-3 NO<sub>x</sub> observations in the Eastern Pacific (RF 1) mean that the P-O3 statistics there (not calculated in this paper) will not be useful.

#### **S.1.4. Species measured by two instruments**

Several species have redundant measurements and these are identified by the duplicate sources in Table S2. The choice of primary (flag = 1) and secondary (flag = 2) are chosen based on continuity of record or coverage of related species, or our estimate of the higher precision measurement. Primary data sources usually have a better data coverage.

**CH<sub>4</sub>:** (1) CH<sub>4</sub>\_NOAA, (2) CH<sub>4</sub>\_QCLS. The primary has more data and does not have spurious anomalies (see previous). There is no evident bias, but some scatter, and so the NaNs in the primary record (which first has had short-gap interpolation as noted above) is simply filled with the secondary record (also with short-gap interpolation).

**CH<sub>2</sub>O:** (1) CH<sub>2</sub>O[ISAF], (2) CH<sub>2</sub>O\_TOGA. Formaldehyde is a key reactive species and TOGA provides a secondary record for the 2<sup>nd</sup> half of ATom-4 when ISAF failed. The



overlapping data with both instruments is plotted in below (Figure S5). The mean difference in overlapping observations is very small (-1 out of a mean of 134 ppt), but the rms is larger (75 ppt). ISAF has a number of values > 1000 ppt, while TOGA has none. A linear fit gives a slope of 0.8 with  $R^2 = 0.59$ , but a 1:1 slope has only slightly smaller  $R^2 = 0.55$ . We do not attempt to rescale the TOGA data in this case and just replace any NaNs remaining in the short-gap-interpolated ISAF record (particularly flights 42:48) with TOGA data (also short-gap interpolated).

**PAN:** (1) PAN\_GTCIMS, (2) PAN\_PECD\*. The GTCIMS joined the mission at ATom-2. The overlap period shows a clear bias between the GTCIMS and PECD observations. A linear fit is clear ( $R^2 = 0.84$ ), and we rescale the secondary PECD\* = (PECD + 0.45)/1.18.

**C<sub>3</sub>H<sub>8</sub>:** (1) Propane\_WAS, (2) Propane\_TOGA. No obvious bias is found. A linear fit gives an  $R^2 = 0.90$ , but the 1:1 line has an  $R^2 = 0.85$ , so we just use the TOGA data directly as the secondary observation.

**iC<sub>4</sub>H<sub>10</sub>:** (1) iButane\_WAS, (2) iButane\_TOGA. No obvious bias is found. A linear fit gives an  $R^2 = 0.955$ , but the 1:1 line has an  $R^2 = 0.947$ , so we just use the TOGA data directly as the secondary observation.

**nC<sub>4</sub>H<sub>10</sub>:** (1) nButane\_WAS, (2) nButane\_TOGA. No obvious bias is found. A linear fit gives an  $R^2 = 0.962$ , but the 1:1 line has an  $R^2 = 0.942$ , so we just use the TOGA data directly as the secondary observation.

**C<sub>5</sub>H<sub>8</sub>:** (1) Isoprene\_TOGA, (2) Isoprene\_WAS. No obvious bias is found. A linear fit gives an  $R^2 = 0.938$ , but the 1:1 line has an  $R^2 = 0.904$ , so we just use the WAS data directly as the secondary observation.

**benzene:** (1) Benzene\_TOGA, (2) Benzene\_WAS. There is some systematic difference between WAS and TOGA (TOGA = ~0.75 x WAS), but the contribution of WAS to the aromatics is small (see flag=2 is <3% in **Table S4**) and so we did not scale WAS.

**toluene:** (1) Toluene\_TOGA + EthBenzene\_TOGA, (2) Toluene\_WAS + EthBenzene\_WAS. No obvious bias is found in spite of the large scatter. A linear fit gives an  $R^2 = 0.75$ , but the 1:1 line has an  $R^2 = 0.74$ , so we just use the TOGA data directly as the secondary observation.

**xylene:** (1) mpXylene\_TOGA + oXylene\_TOGA, (2) mpXylene\_WAS + oXylene\_WAS. No obvious bias is found in spite of the very large scatter. A linear fit gives an  $R^2 = 0.3$ , so we just use the WAS data directly as the secondary observation.

**HCN:** (1) HCN\_CIT, (2) HCN\_TOGA. The CIT observation is chosen as primary because of its more continuous, 10s record. In spite of the large scatter, a linear fit with a slope of 0.8 does not greatly reduce the variance ( $R^2 = 0.74$  vs 0.65 for 1:1), so we just use the TOGA data directly as the secondary observation.

**SF6:** (1) SF6\_PECD, (2) SF6\_UCATS. The scatter seems large, but the relationship is mostly 1:1 with  $R^2 = 0.90$ . A linear fit gives a slope of 0.99, and so we just use the UCATS data directly as the secondary observation. Both data sets are sparse.

### S.1.5. Seasonality of ATom 1-4 data

As a quick look at the opportunities provided by the ATom data, we consider two examples. Figure S6 shows that the 4-season transects of ATom (deployments 1, 2, 3 and 4) produced remarkably similar patterns of the 2-D PDs for HOOH versus  $\text{NO}_x$  in Central Pacific, providing a useful benchmark for the modeling community. The ellipse fits show almost identical overlap for ATom 2-3-4 and overlap with ATom-1 except for regions of very low (2-10 ppt)  $\text{NO}_x$ . The implication is that the chemical patterns of the tropical Central Pacific are represented by a single transect and do not change much seasonally.

## S.2. The Reactivity Data Stream

In this paper, we use the 6 models for their August chemical statistics, and use 5 of them plus a box model to calculate the reactivities (i.e., chemical tendencies) from the ATom-1 MDS, see Table S7.

In the models, a grid cell is initialized with all the core reactive species needed for a regular chemistry simulation. The model is then integrated over 24 hours without transport or mixing, without scavenging, and without emissions. Each model uses its own varying cloud fields for the period to calculate photolysis rates; and the reactions rates are integrated. The F0AM box model simply takes the instant J-values as measured on the flight and applies a diurnal scaling. We calculate the three major reactivities ( $R_s$ ) from the rates.

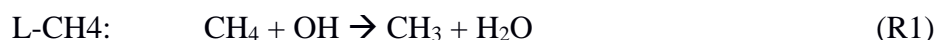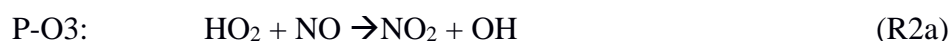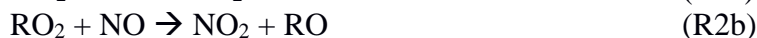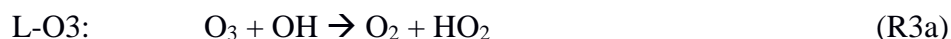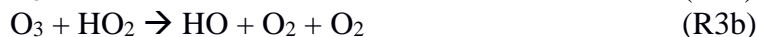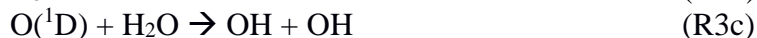

The peroxy radical  $\text{RO}_2$  is used to represent all species like  $\text{CH}_3\text{O}_2$ ,  $\text{C}_2\text{H}_5\text{O}_2$ , and more complex organic species. While the net P-O3 minus L-O3 can involve other reactions, particularly with  $\text{NO}_x$  and unsaturated organics in polluted environments, Prather et al. (2017) showed that the difference in these two reactivities accurately described the  $\text{O}_3$  tendencies in most regions, including aged pollution plumes over the ocean basins. Two photolysis rates (J-values) are linked strongly with the reactivities, and their 24-hr

averages are also included in the model-derived RDS because they provide useful diagnostics:

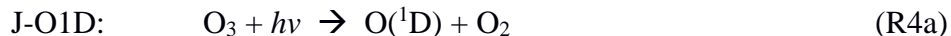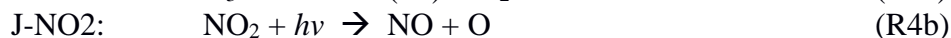

Prather et al. (2018) showed that we can initialize with the core species and let the radicals (OH, HO<sub>2</sub>, RO<sub>2</sub>) come into photochemical balance. Prather et al. (2018) also found that the 24-hour integration using the synthetic MDS along the Dateline was not overly sensitive to the initialization time (at most 4% in P-O3, 1% in L-O3 and L-CH4), and thus models do not have to synchronize with the local time of observation (see their Figure S8 and their Table S8). The summary statistics of these reactivities and J-values from the six models using MDS\_R0, from 3 different years with the UCI model, from GMI using MDS\_R1, and from UCI using MDS\_R2 are given in Table S8. The ATom-1 data are sorted for the Pacific and Atlantic basin as well as global. We show: means, medians and mean of the top 10% of reactive parcels; percent of total reactivity in the top 50%, top 10% and top 3%; and mean J-values.

Variations in reactivities due to clouds is an irreducible source of uncertainty: predicting the cloud-driven photolysis rates that a shearing air parcel will experience over 24 hours is not possible here. The protocol asks models to sample 5 separated days during the deployment month (e.g., August 1, 6, 11, 16, 21 for ATom-1) to average over synoptically varying cloud conditions. The averaged standard deviation ( $\sigma$ ) of reactivity over the 5 days is calculated in % of the mean. In Table S9, it is about 10% for the 3 similar CTMs (GC, GMI, UCI) but twice as large for the 2 CCMs (GISS, NCAR). For the 3 CTMs, the  $\sigma$  of the J-values is similar (~10%), as expected because variations in the J's via clouds drives the reactivities. Results from the UCI CTM running different years show the same 10% level. For GISS and NCAR, the results are more cryptic: J-value  $\sigma$  are larger (12 – 17%); but the reactivity  $\sigma$  are larger still (14 – 32%). We have not resolved these differences. The F0AM box model does not include clouds directly but calculates its own clear-sky J-values and scales the diurnal cycle to the single observed J-value at the time of measurement, thus maintaining the same proportional cloud effects over all daytime hours.

One-dimensional probability density functions (PDs) for the 3 Rs along the Pacific and Atlantic transects of ATom-1 are presented in **Figure S7**. These are the 54°S-60°N oceanic measurements. The mean values for the six models (colors, "a day in mid-August" for the blocks shown in **Figure S1**) and the ATom-1 flights (black, UCI model, MDS\_R2) are shown in the figure legend. For the Pacific, the high reactivities in the Eastern Pacific (10°N-30°N) do not substantially alter the PD as seen by comparing the whole Pacific (solid black) with just the Central Pacific (dashed gray), but they do shift the mean reactivities upward by 10-20%. Occurrences beyond the uppermost bin shown (6 ppb/d for P-O3, L-O3; 3 ppb/d for L-CH4) are included in that bin and result in an obvious uptick for P-O3 and L-O3. This uptick is not seen for the Central Pacific alone (gray circles), indicating that the extreme reactivities occur in the Eastern Pacific (Figure 2 in main text).

For P-O<sub>3</sub>, the difference between the five of the six global chemistry models and ATom is distinct in both basins. ATom shows a large occurrence of moderately reactive air with P-O<sub>3</sub> > 2 ppb/d in both Pacific (48%) and Atlantic (54%). The models show much less of such air in both Pacific (6-10%) and Atlantic (17-30%). Thus, the ATom chemical mix of reactive species is far more effective in producing O<sub>3</sub> than that in most all CTM/CCMs. This result holds for both Pacific and Atlantic transects and thus is unlikely a result of biased ATom sampling. We conclude that our models have a fundamental flaw in O<sub>3</sub> production over the major ocean basins. For both L-O<sub>3</sub> and L-CH<sub>4</sub>, both ATom and models have similar mean values and their PDs are remarkably similar. For L-CH<sub>4</sub>, one can see a slight systematic shift between the two, with ATom having lower occurrence in the 0.5-1.5 ppb/d range, but greater in the 1.5-2.5 ppb/d range. Generally, five models (GC, GFDL, GMI, NCAR, UCI) show a similar pattern and mean values for all 3 Rs and both ocean basins, while the sixth model (GISS) is inexplicable as noted before.

Also, the ability to test the model's reactivity statistics with the ATom 10 s data is not obvious. For example, in Figure S8, we take the Pacific P-O<sub>3</sub> frequency (black), generate a random set of points from that distribution, and then start averaging adjacent points in groups (2, 4, 8; denoted as 4 km, 8km, 16 km). The resulting statistics rapidly evolve into a Gaussian-like distribution about the mean value. Thus, the ability to nearly match the ATom-1 statistics with our global chemistry models is significant, and we cannot explain the P-O<sub>3</sub> discrepancy as a model-averaging problem.

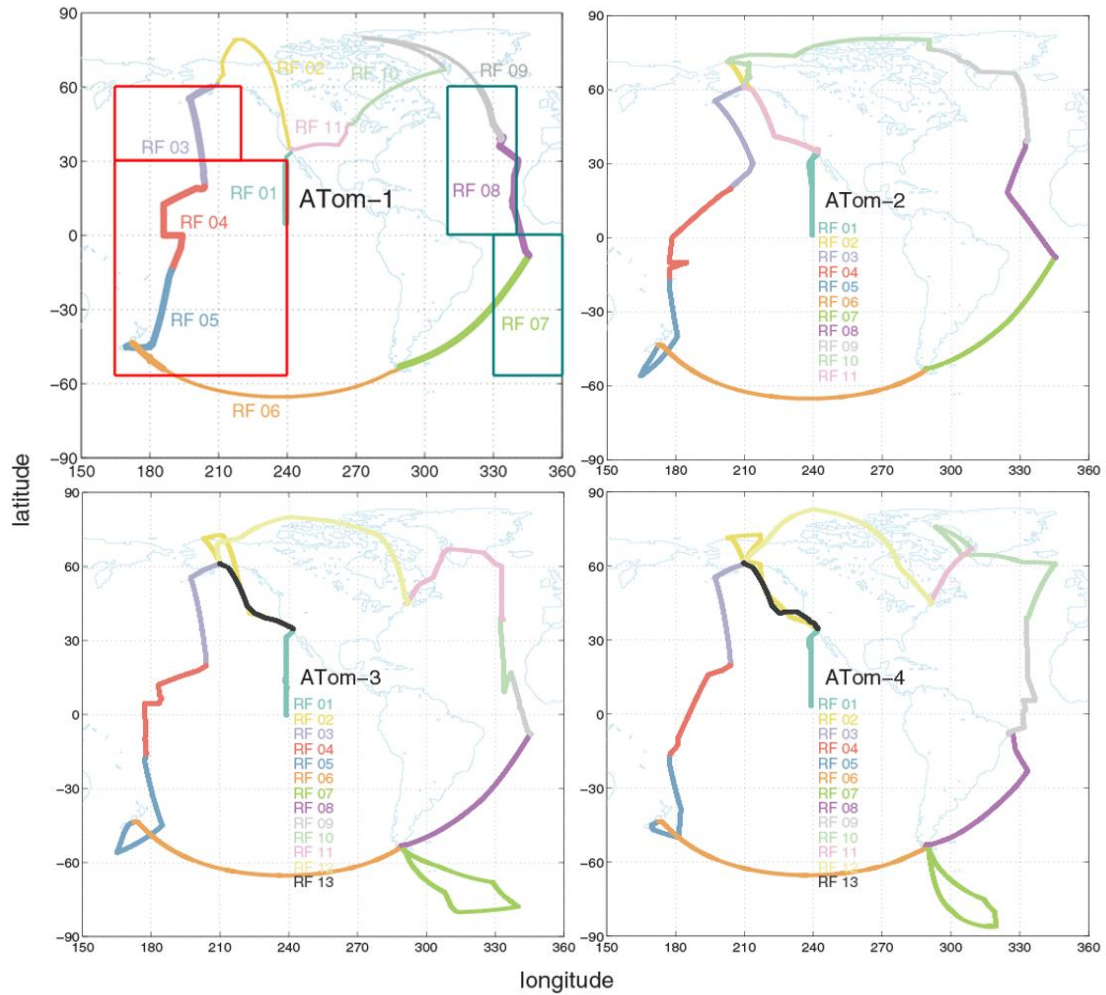

**Figure S1.** Flight tracks for the 4 ATom deployments. For ATom-1, the flight segments considered Pacific and Atlantic domains are shown with very thick lines. The corresponding blocks used for model climatologies are outlined with rectangles: Pacific, red; Atlantic, blue-green.

530

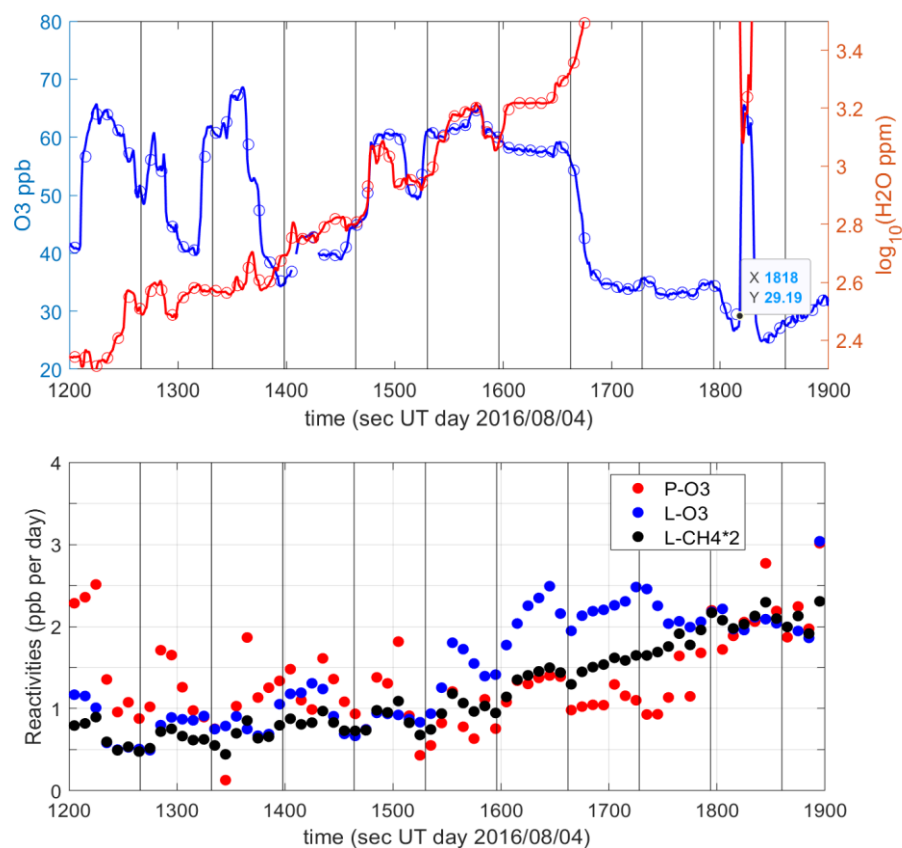

**Figure S2.** Profile during a descent on the Anchorage-Kona flight (ATom-1, RF-3, 31°N). The profile here begins at 7.2 km (1200 s) and ends at 2.1 km (1900 s,  $H_2O$  is cut off). (a) Fine structure in  $O_3$  (ppb) and  $H_2O$  ( $\log_{10}$ , ppm) at 1-sec (solid line) and 10 s (open circles) resolution. (b) Reactivities for the 10 s parcels calculated with the UCI CTM. Descent rate averaged 7.5 m/s, and vertical lines indicate 500 m thick layers.

531

532

533

534

535

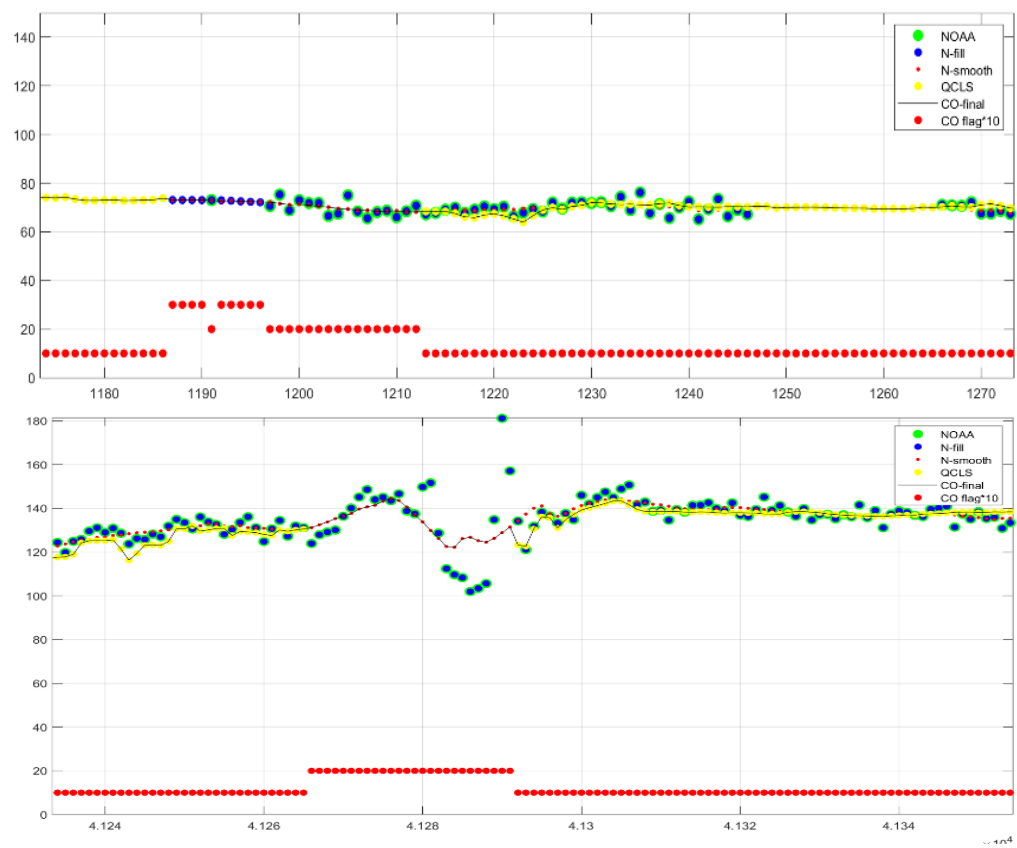

**Figure S3.** Example of CO time series showing all the intermediate CO products and flags. See legend and text.

536

537

538



539

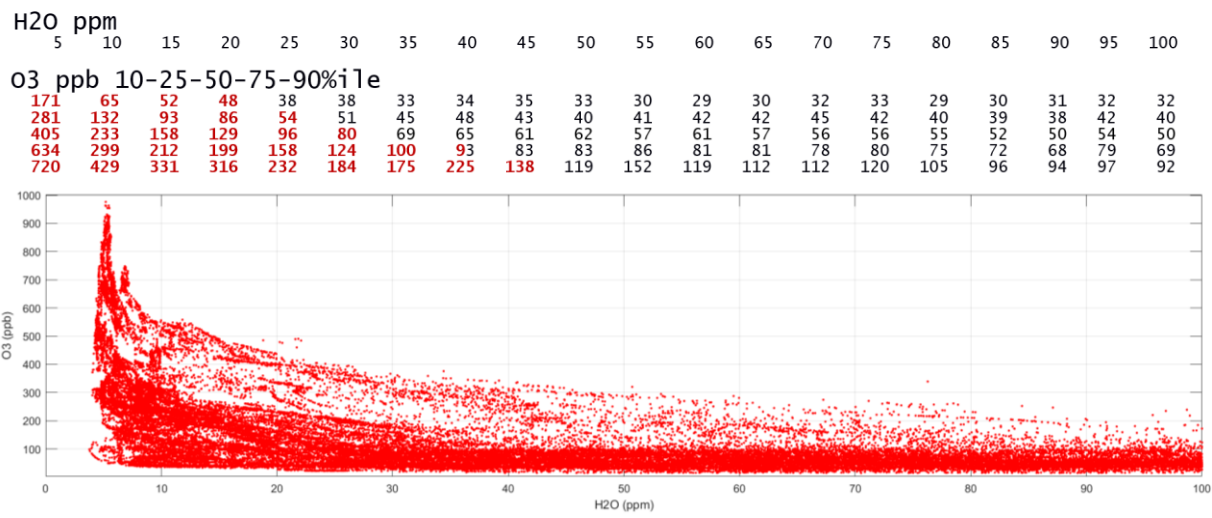

**Figure S4a.** Scatter plot of O<sub>3</sub> (ppb) and H<sub>2</sub>O (ppm) for all ATom deployments, filtered by H<sub>2</sub>O < 100 ppm. The percentiles (10-25-50-75-90 %ile) of O<sub>3</sub> in each 5-ppm-wide bin starting at 5 ppm (= 2.5–7.5 ppm) ending at 100 ppm in in the table at the top of this figure. Stratospheric influence (red) is clearly seen in the median for <30 ppm.

540  
541  
542

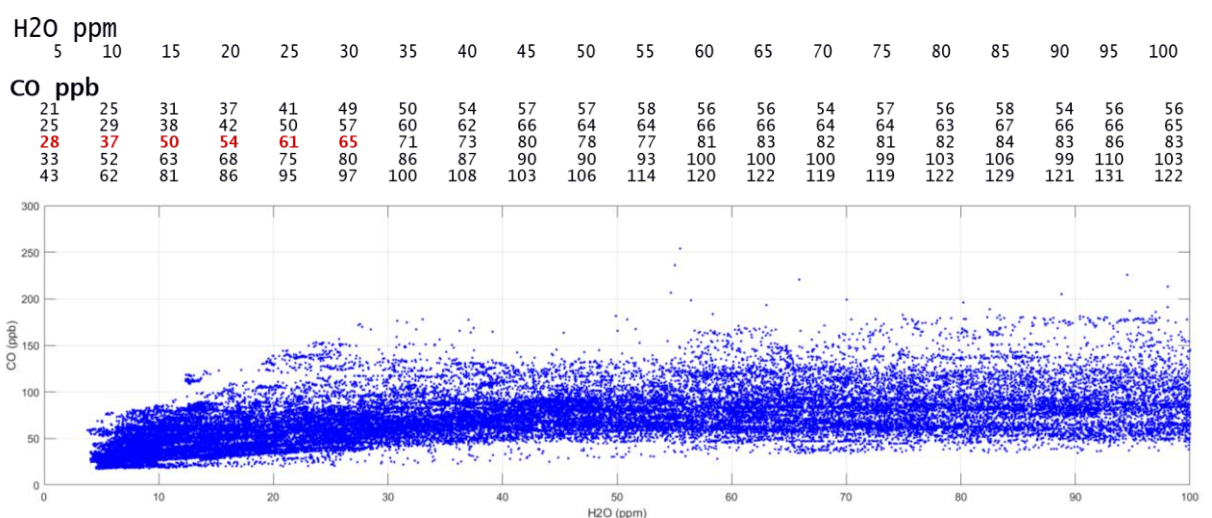

**Figure S4b.** Scatter plot of CO (ppb) and H<sub>2</sub>O (ppm) for all ATom deployments, filtered by H<sub>2</sub>O < 100 ppm. See Figure S4a.

543  
544  
545



546

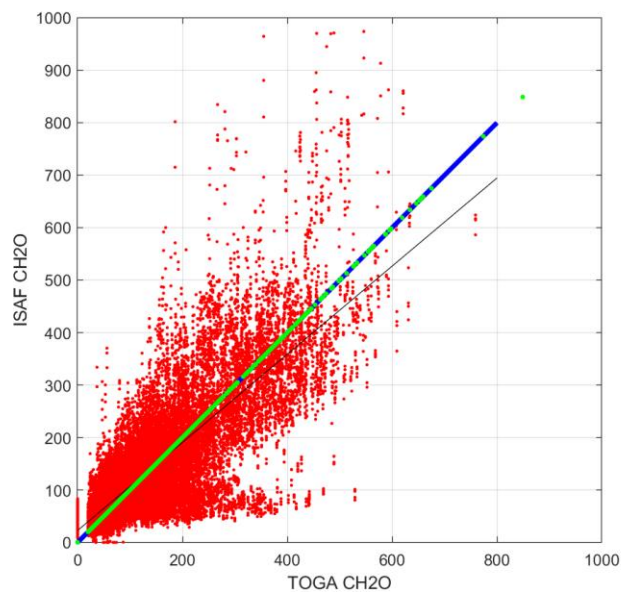

**Figure S5.** Scatter plot of coincident HCHO measurements (ppb) from ISAF and TOGA for all ATom deployments. The thick blue-green line is the 1:1 relationship and the thin black line shows a linear regression of ISAF vs. TOGA. Notably, ISAF has more frequent high values >600 ppb, with some above 1000 ppb (not shown).

547

548

549

550  
551

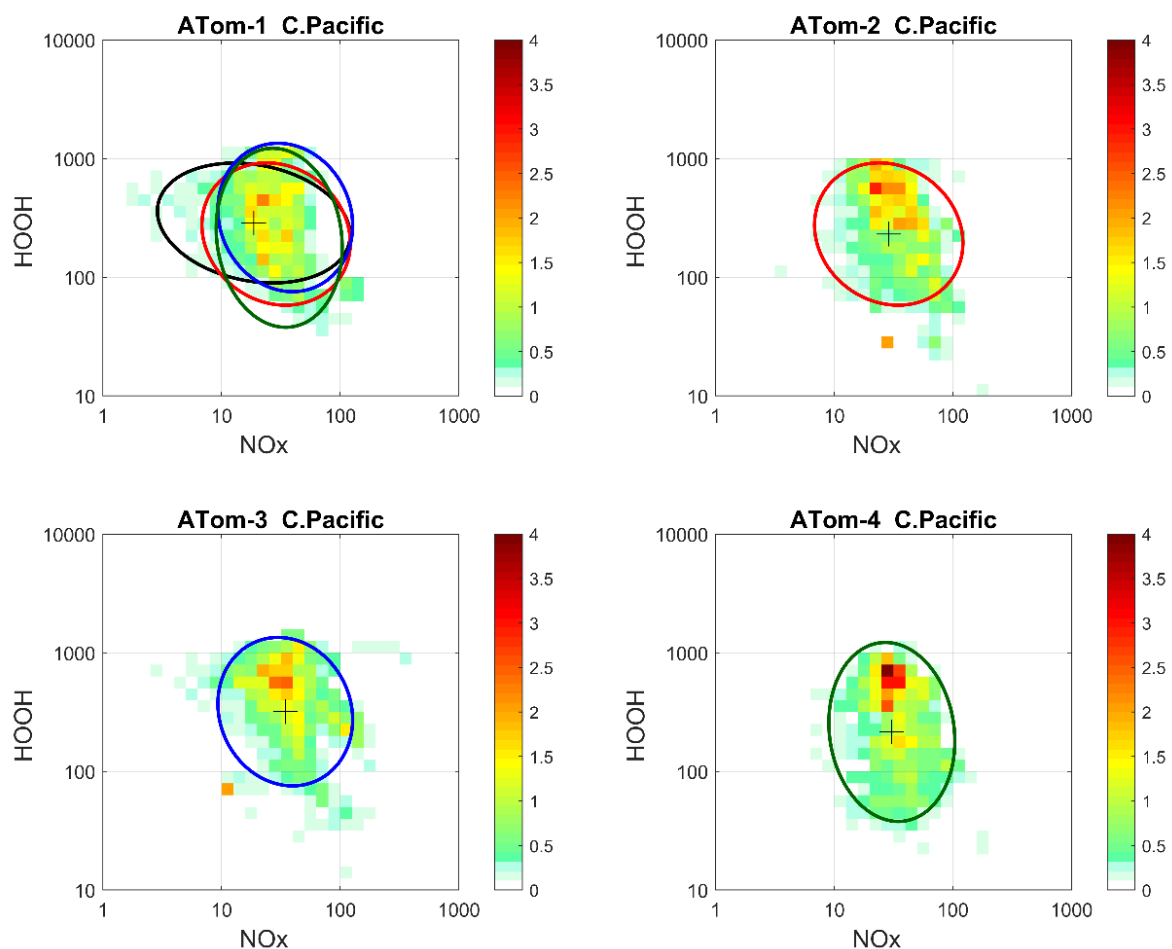

**Figure S6.** 2D frequency of occurrence (PDs in log ppt mole fraction) of HOOH vs. NOx for the tropical Central Pacific for all 4 ATom deployments. The cross marks the mean (in log space), and the ellipse is fitted to the rotated PD to have the smallest semi-minor axis. The semi-minor and semi-major axes are 2 standard deviations of PD in that direction. The ellipses from ATom-2 (red), ATom-3 (blue), and ATom-4 (dark green) are also plotted in the ATom-1 quadrant.

552  
553

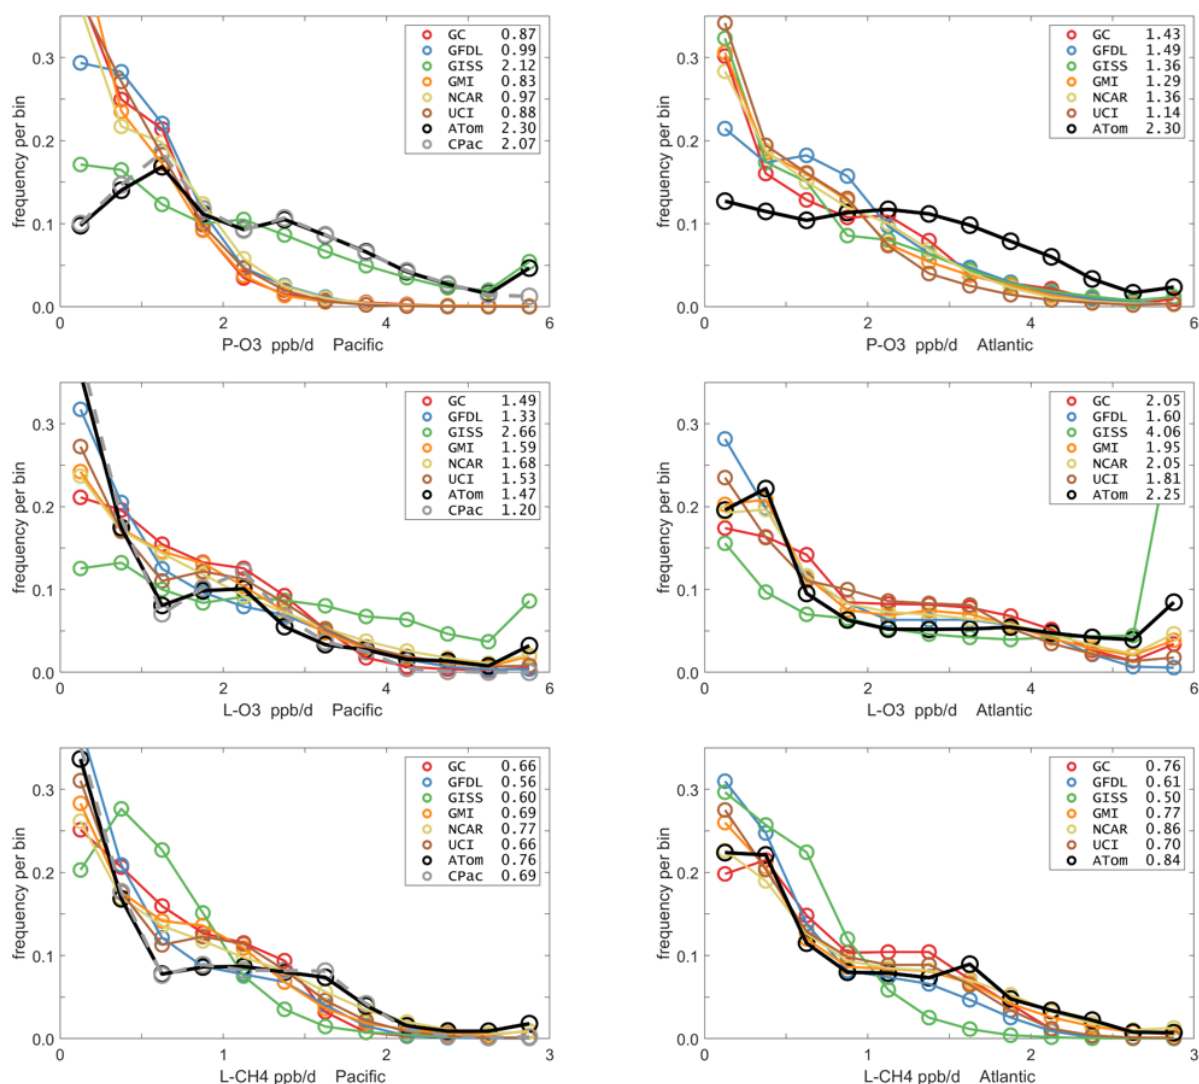

**Figure S7.** Probability distributions (frequency of occurrence) for the ATom-1 3 reactivities (rows: P-O3, L-O3, L-CH4 in ppb/day) and for the Pacific and Atlantic from 54°S to 60°N (columns left and right). Each air parcel is weighted as described in the text for equal frequency in large latitude-pressure bins, and also by cosine(latitude). The ATom statistics are for UCI model and ATom-1 MDS\_R2. The full Pacific results (solid black) also include just the Central Pacific (dashed gray). The 6 models' values for a day in mid-August are averaged over longitude for the domains shown in Figure S1, and then cosine(latitude) weighted. Mean values (ppb/day) are shown in the legend.

555

556

557

558  
559

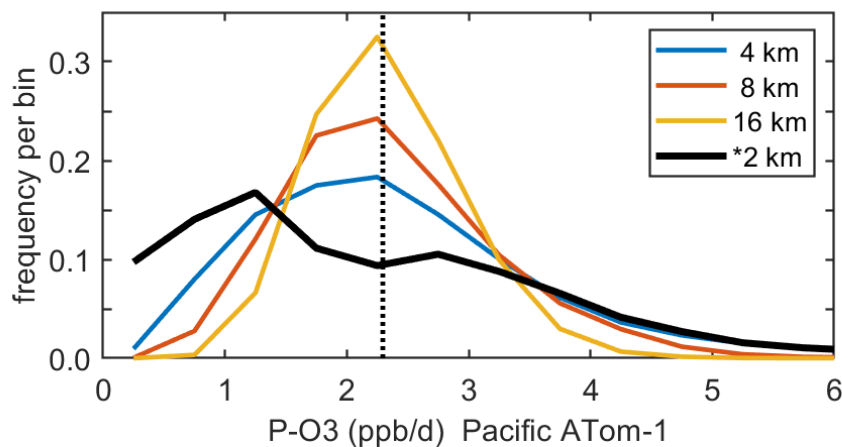

**Figure S8.** Frequency of occurrence of P-O3 (ppb/d) per 0.5 ppb/d bins. The black curve shows the ATom-1 results for the Pacific Ocean (54°S-60°N) with each air parcel weighted as described in the text. The 10 s parcels have a resolution of about 2 km horizontally. A large random time series ( $10^5$  parcels) was generated from the ATom frequency curve, and then smoothed over 2, 4, and 8 sequential points. If the successive ATom parcels were randomly distributed, then smoothing over scales of  $\sim 10$  km rapidly changes the frequency into a Gaussian centered on the mean value (vertical dotted line). The heterogeneity scales in P-O3 are clearly much larger than 2 km as seen in **Figure S2**. Further, the ability of models with 100 km scales to reproduce the frequency of occurrence seen in the ATom parcels indicates that the heterogeneity is large scale and being resolved by the models, not average over.

560  
561

| <b>Table S1. ATom flight data</b>                                   |                     |             |          |              |            |          |                                   |            |
|---------------------------------------------------------------------|---------------------|-------------|----------|--------------|------------|----------|-----------------------------------|------------|
| ATom research flights in the Mor.2020-05-27...tbl (149,133 parcels) |                     |             |          |              |            |          | Airport removed (146,494 parcels) |            |
| ATom deployment                                                     | Research Flight no. | ATom flight | Airports | parcel begin | parcel end | YYYYMMDD | parcel begin                      | parcel end |
| 1                                                                   | 1                   | 1           | PMD PMD* | 1            | 3380       | 20160729 | 1                                 | 3333       |
| 1                                                                   | 2                   | 2           | PMD ANC  | 3381         | 7038       | 20160801 | 3334                              | 6939       |
| 1                                                                   | 3                   | 3           | ANC KOA  | 7039         | 9658       | 20160803 | 6940                              | 9526       |
| 1                                                                   | 4                   | 4           | KOA PPG  | 9659         | 12760      | 20160806 | 9527                              | 12583      |
| 1                                                                   | 5                   | 5           | PPG CHC  | 12761        | 15141      | 20160808 | 12584                             | 14917      |
| 1                                                                   | 6                   | 6           | CHC PUQ  | 15142        | 18976      | 20160812 | 14918                             | 18692      |
| 1                                                                   | 7                   | 7           | PUQ ASI  | 18977        | 22355      | 20160815 | 18693                             | 21998      |
| 1                                                                   | 8                   | 8           | ASI TER  | 22356        | 25431      | 20160817 | 21999                             | 25040      |
| 1                                                                   | 9                   | 9           | TER SFJ  | 25432        | 28976      | 20160820 | 25041                             | 28544      |
| 1                                                                   | 10                  | 10          | SFJ MSP  | 28977        | 31127      | 20160822 | 28545                             | 30663      |
| 1                                                                   | 11                  | 11          | MSP PMD  | 31128        | 32899      | 20160823 | 30664                             | 32383      |
| 2                                                                   | 1                   | 12          | PMD PMD* | 32900        | 36621      | 20170126 | 32384                             | 36061      |
| 2                                                                   | 2                   | 13          | PMD ANC  | 36622        | 40115      | 20170129 | 36062                             | 39480      |
| 2                                                                   | 3                   | 14          | ANC KOA  | 40116        | 43062      | 20170201 | 39481                             | 42360      |
| 2                                                                   | 4                   | 15          | KOA NAN  | 43063        | 46470      | 20170203 | 42361                             | 45717      |
| 2                                                                   | 5                   | 16          | NAN CHC  | 46471        | 49562      | 20170205 | 45718                             | 48774      |
| 2                                                                   | 6                   | 17          | CHC PUQ  | 49563        | 53116      | 20170210 | 48775                             | 52267      |
| 2                                                                   | 7                   | 18          | PUQ ASI  | 53117        | 56358      | 20170213 | 52268                             | 55390      |
| 2                                                                   | 8                   | 19          | ASI TER  | 56359        | 59468      | 20170215 | 55391                             | 58446      |
| 2                                                                   | 9                   | 20          | TER THU  | 59469        | 62151      | 20170218 | 58447                             | 61088      |
| 2                                                                   | 10                  | 21          | THU ANC  | 62152        | 64893      | 20170219 | 61089                             | 63762      |
| 2                                                                   | 11                  | 22          | ANC PMD  | 64894        | 66978      | 20170221 | 63763                             | 65807      |
| 3                                                                   | 1                   | 23          | PMD PMD* | 66979        | 70683      | 20170928 | 65808                             | 69465      |
| 3                                                                   | 2                   | 24          | PMD ANC  | 70684        | 74281      | 20171001 | 69466                             | 73001      |
| 3                                                                   | 3                   | 25          | ANC KOA  | 74282        | 76949      | 20171004 | 73002                             | 75608      |
| 3                                                                   | 4                   | 26          | KOA NAN  | 76950        | 80163      | 20171006 | 75609                             | 78754      |
| 3                                                                   | 5                   | 27          | NAN CHC  | 80164        | 83472      | 20171008 | 78755                             | 82000      |
| 3                                                                   | 6                   | 28          | CHC PUQ  | 83473        | 87028      | 20171011 | 82001                             | 85462      |
| 3                                                                   | 7                   | 29          | PUQ PUQ^ | 87029        | 90872      | 20171014 | 85463                             | 89225      |
| 3                                                                   | 8                   | 30          | PUQ ASI  | 90873        | 94279      | 20171017 | 89226                             | 92576      |
| 3                                                                   | 9                   | 31          | ASI SID  | 94280        | 95928      | 20171019 | 92577                             | 94191      |
| 3                                                                   | 10                  | 32          | SID TER  | 95929        | 98695      | 20171020 | 94192                             | 96916      |
| 3                                                                   | 11                  | 33          | TER BGR  | 98696        | 102094     | 20171023 | 96917                             | 100272     |
| 3                                                                   | 12                  | 34          | BGR ANC  | 102095       | 105540     | 20171025 | 100273                            | 103677     |
| 3                                                                   | 13                  | 35          | ANC PMD  | 105541       | 107873     | 20171027 | 103678                            | 105983     |
| 4                                                                   | 1                   | 36          | PMD PMD* | 107874       | 111294     | 20180424 | 105984                            | 109357     |
| 4                                                                   | 2                   | 37          | PMD ANC  | 111295       | 115012     | 20180427 | 109358                            | 113028     |
| 4                                                                   | 3                   | 38          | ANC KOA  | 115013       | 117934     | 20180429 | 113029                            | 115847     |
| 4                                                                   | 4                   | 39          | KOA NAN  | 117935       | 120880     | 20180501 | 115848                            | 118741     |
| 4                                                                   | 5                   | 40          | NAN CHC  | 120881       | 123717     | 20180503 | 118742                            | 121542     |
| 4                                                                   | 6                   | 41          | CHC PUQ  | 123718       | 127370     | 20180506 | 121543                            | 125122     |
| 4                                                                   | 7                   | 42          | PUQ PUQ^ | 127371       | 131238     | 20180509 | 125123                            | 128934     |
| 4                                                                   | 8                   | 43          | PUQ REC  | 131239       | 134829     | 20180512 | 128935                            | 132463     |
| 4                                                                   | 9                   | 44          | REC TER  | 134830       | 138214     | 20180514 | 132464                            | 135770     |
| 4                                                                   | 10                  | 45          | TER SFJ  | 138215       | 141697     | 20180517 | 135771                            | 139210     |
| 4                                                                   | 11                  | 46          | SFJ BGR  | 141698       | 142846     | 20180518 | 139211                            | 140316     |
| 4                                                                   | 12                  | 47          | BGR ANC  | 142847       | 146670     | 20180519 | 140317                            | 144095     |
| 4                                                                   | 13                  | 48          | ANC PMD  | 146671       | 149133     | 20180521 | 144096                            | 146494     |

\* 4 flights to equator following 120W. ^ 2 flights to 80S and 86S over Antarctica.

| <b>Table S2. MDS data and source</b> |                             |                                                                           |                                                                                              |
|--------------------------------------|-----------------------------|---------------------------------------------------------------------------|----------------------------------------------------------------------------------------------|
| <b>id#</b>                           | <b>MDS data designation</b> | <b>Description</b>                                                        | <b>ATom source name</b>                                                                      |
| 1                                    | parcel_M                    | Unique sequential parcel number for all MDS 10s data, beginning 1,000,001 |                                                                                              |
| 2                                    | ATno                        | ATom deployment number (1:4)                                              | A.no                                                                                         |
| 3                                    | RFno                        | Research Flight number (1:11, 1:11, 1:13, 1:13)                           | RF                                                                                           |
| 4                                    | RRno                        | RF number across all of ATom (1:48)                                       |                                                                                              |
| 5                                    | YYMMDD                      | Date (UT) of the start of each RF                                         | YYMMDD                                                                                       |
| 6                                    | UTC_M                       | Start time in sec relative to Date for each 10s parcel                    | UTC_Start                                                                                    |
| 7                                    | Lat_M                       | Latitude (-90:+90)                                                        | G_LAT                                                                                        |
| 8                                    | Lng_M                       | Longitude (-180:+180)                                                     | G_LONG                                                                                       |
| 9                                    | Alt_M                       | Altitude (m above mean sea level)                                         | G_ALT                                                                                        |
| 10                                   | P_M                         | Pressure (hPa)                                                            | P                                                                                            |
| 11                                   | T_M                         | Temperture (K)                                                            | T                                                                                            |
| 12                                   | H2O_M                       | water, ppm (all dry air mole fraction)                                    | H2O_DLH                                                                                      |
| 13                                   | RHw_M                       | relative humidity over liquid water (%)                                   | RHw_DLH                                                                                      |
| 14                                   | O3_M                        | ozone, ppb                                                                | O3_CL                                                                                        |
| 15                                   | CO_M                        | carbon monoxide, ppb                                                      | (1) CO_QCLS, (2) CO_NOAA                                                                     |
| 16                                   | CH4_M                       | methane, ppb                                                              | (1) CH4_NOAA, (2) CH4_QCLS                                                                   |
| 17                                   | NOx_M                       | odd-nitrogen, NO+NO2, ppt                                                 | NO_CL + NO2_CL                                                                               |
| 18                                   | NOxPSS_M                    | odd-nitrogen, with photo-stationary state NO2, ppt                        | NOx_PSS                                                                                      |
| 19                                   | HNO3_M                      | nitric acid, HONO2, ppt                                                   | HNO3_CIT                                                                                     |
| 20                                   | HNO4_M                      | pernitric acid, HO2NO2, ppt                                               | PNA_CIT                                                                                      |
| 21                                   | PAN_M                       | peroxyacetyl nitrate, C2H3NO5 - CH3C(O)OONO2, ppt                         | (1) PAN_GTCIMS, (2) PAN_PECDD*                                                               |
| 22                                   | CH2O_M                      | formaldehyde, HCHO, ppt                                                   | (1) CH2O[_ISAF], (2) CH2O_TOGA                                                               |
| 23                                   | H2O2_M                      | hydrogen peroxide, HOOH, ppt                                              | H2O2_CIT                                                                                     |
| 24                                   | CH3OOH_M                    | methyl hydrogen peroxide, ppt                                             | MHP_CIT                                                                                      |
| 25                                   | Acetone_M                   | acetone, CH3C(O)CH3, ppt                                                  | Acetone_TOGA                                                                                 |
| 26                                   | Acetald_M                   | acetaldehyde, CH3C(O)H, ppt                                               | CH3CHO_TOGA                                                                                  |
| 27                                   | C2H6_M                      | ethane, C2H6, ppt                                                         | Ethane_WAS                                                                                   |
| 28                                   | C3H8_M                      | propane, C3H8, ppt                                                        | (1) Propane_WAS, (2) Propane_TOGA                                                            |
| 29                                   | iC4H10_M                    | iso-butane, iC4H10, ppt                                                   | (1) iButane_WAS, (2) iButane_TOGA                                                            |
| 30                                   | nC4H10_M                    | n-butane, nC4H10, ppt                                                     | (1) nButane_WAS, (2) nButane_TOGA                                                            |
| 31                                   | Alkanes_M                   | pentane (C5H12) and higher, ppt                                           | iPentane_WAS + nPentane_WAS + nHexane_WAS + nHeptane_WAS + x2MePentane_WAS + x3MePentane_WAS |
| 32                                   | C2H4_M                      | ethene, C2H4, ppt                                                         | Ethene_WAS                                                                                   |
| 33                                   | Alkenes_M                   | propene (C3H6) and higher, ppt                                            | Propene_WAS                                                                                  |
| 34                                   | C2H2_M                      | acetylene (ethyne), C2H2, ppt                                             | Ethyne_WAS                                                                                   |
| 35                                   | C5H8_M                      | isoprene, C5H8, ppt                                                       | (1) Isoprene_TOGA, (2) Isoprene_WAS                                                          |

|                                                                                                                                                                                                                                                                                                                                                                                                    |                      |                                                                                                |                                                                                                    |
|----------------------------------------------------------------------------------------------------------------------------------------------------------------------------------------------------------------------------------------------------------------------------------------------------------------------------------------------------------------------------------------------------|----------------------|------------------------------------------------------------------------------------------------|----------------------------------------------------------------------------------------------------|
| 36                                                                                                                                                                                                                                                                                                                                                                                                 | Benzene_M            | benzene, C <sub>6</sub> H <sub>6</sub> , ppt                                                   | (1) Benzene_TOGA, (2) Benzene_WAS*                                                                 |
| 37                                                                                                                                                                                                                                                                                                                                                                                                 | Toluene_M            | methylbenzene, C <sub>7</sub> H <sub>8</sub> , ppt                                             | (1) Toluene_TOGA+EthBenzene_TOGA, (2) Toluene_WAS + EthBenzene_WAS                                 |
| 38                                                                                                                                                                                                                                                                                                                                                                                                 | Xylene_M             | dimethylbenzene, C <sub>8</sub> H <sub>10</sub> , ppt                                          | (1) mpXylene_TOGA+oXylene_TOGA, (2) mpXylene_WAS+oXylene_WAS                                       |
| 39                                                                                                                                                                                                                                                                                                                                                                                                 | MeONO2_M             | methyl nitrate, CH <sub>3</sub> ONO <sub>2</sub> , ppt                                         | MeONO2_WAS                                                                                         |
| 40                                                                                                                                                                                                                                                                                                                                                                                                 | EtONO2_M             | ethyl nitrate, CH <sub>3</sub> ONO <sub>2</sub> , ppt                                          | EthONO2_WAS                                                                                        |
| 41                                                                                                                                                                                                                                                                                                                                                                                                 | RONO2_M              | higher organo nitrates, R=C <sub>3</sub> +, ppt                                                | iPropONO2_WAS + nPropONO2_WAS + x2ButONO2_WAS + x3PentONO2_WAS + x2PentONO2_WAS + x3Me2ButONO2_WAS |
| 42                                                                                                                                                                                                                                                                                                                                                                                                 | MeOH_M               | methanol, CH <sub>3</sub> OH, ppt                                                              | CH <sub>3</sub> OH_TOGA                                                                            |
| 43                                                                                                                                                                                                                                                                                                                                                                                                 | HCN_M                | hydrogen cyanide, ppt                                                                          | (1) HCN_CIT, (2) HCN_TOGA                                                                          |
| 44                                                                                                                                                                                                                                                                                                                                                                                                 | CH <sub>3</sub> CN_M | acetonitrile (methyl cyanide), CH <sub>3</sub> CN, ppt                                         | CH <sub>3</sub> CN_TOGA                                                                            |
| 45                                                                                                                                                                                                                                                                                                                                                                                                 | SF <sub>6</sub> _M   | sulfure hexafluoride, ppt                                                                      | (1) SF <sub>6</sub> _PECD, (2) SF <sub>6</sub> _UCATS                                              |
| 46                                                                                                                                                                                                                                                                                                                                                                                                 | S_nuc_M              | particle surface area (um <sup>2</sup> /cm <sup>3</sup> ), nucleation: 0.0027 < Dp <= 0.012 um | S_nucl_AMP                                                                                         |
| 47                                                                                                                                                                                                                                                                                                                                                                                                 | S_atk_M              | particle surface area (um <sup>2</sup> /cm <sup>3</sup> ), Aitken: 0.012 < Dp <=0.06 um        | S_aitken_AMP                                                                                       |
| 48                                                                                                                                                                                                                                                                                                                                                                                                 | S_acc_M              | particle surface area (um <sup>2</sup> /cm <sup>3</sup> ), accumulation: 0.06 < Dp <=0.50 um   | S_accum_AMP                                                                                        |
| 49                                                                                                                                                                                                                                                                                                                                                                                                 | S_crs_M              | particle surface area (um <sup>2</sup> /cm <sup>3</sup> ), coarse: 0.50 < Dp <=4.8 um          | S_coarse_AMP                                                                                       |
| 50                                                                                                                                                                                                                                                                                                                                                                                                 | CloudInd_M           | cloud indicator (0:4), dimensionless                                                           | cloudindicator_CAPS                                                                                |
| Note: The flag value, flag_M(:,1:50) is indexed to the 50 variables above. Only flag_M(:,10:50) have meaningful values. The flag values are: 0 (NaNs, only in research flight 46), 1 (primary data), 2 (secondary data), 3 (short-gap interpolation), 4 (long-gap interpolation for troposphere), 5 (missing flight filled) and 6 (long-gap interpolation for stratosphere) are described in text. |                      |                                                                                                |                                                                                                    |

567  
568  
569

| <b>Table S3a. ATom-1, % of non-NaNs after short-gap interpolation</b> |             |             |             |             |             |             |             |             |             |             |             |
|-----------------------------------------------------------------------|-------------|-------------|-------------|-------------|-------------|-------------|-------------|-------------|-------------|-------------|-------------|
| <b>RRno</b>                                                           | <b>1</b>    | <b>2</b>    | <b>3</b>    | <b>4</b>    | <b>5</b>    | <b>6</b>    | <b>7</b>    | <b>8</b>    | <b>9</b>    | <b>10</b>   | <b>11</b>   |
| <Lat> (deg)                                                           | 20          | 62          | 42          | 4           | -34         | -58         | -32         | 18          | 65          | 55          | 38          |
| <Lng> (deg)                                                           | -120        | -133        | -158        | -169        | -83         | -87         | -37         | -21         | -49         | -78         | -104        |
| <Alt> (m)                                                             | 7055        | 8092        | 7118        | 6143        | 6634        | 7034        | 6761        | 6494        | 6930        | 6090        | 7736        |
| <b># parcels</b>                                                      | <b>3333</b> | <b>3606</b> | <b>2587</b> | <b>3057</b> | <b>2334</b> | <b>3775</b> | <b>3306</b> | <b>3042</b> | <b>3504</b> | <b>2119</b> | <b>1720</b> |
| H2O_M                                                                 | 100%        | 100%        | 100%        | 100%        | 100%        | 100%        | 100%        | 100%        | 100%        | 100%        | 100%        |
| RHw_M                                                                 | 100%        | 100%        | 100%        | 100%        | 100%        | 100%        | 100%        | 100%        | 100%        | 100%        | 100%        |
| O3_M                                                                  | 99%         | 99%         | 100%        | 99%         | 100%        | 100%        | 99%         | 100%        | 100%        | 100%        | 100%        |
| CO_M                                                                  | 100%        | 100%        | 100%        | 100%        | 100%        | 100%        | 100%        | 100%        | 100%        | 100%        | 100%        |
| CH4_M                                                                 | 54%         | 95%         | 95%         | 94%         | 86%         | 93%         | 94%         | 92%         | 95%         | 95%         | 93%         |
| NOx_M                                                                 | 90%         | 94%         | 91%         | 84%         | 91%         | 85%         | 96%         | 98%         | 89%         | 95%         | 94%         |
| NOxPSS_M                                                              | 94%         | 91%         | 91%         | 86%         | 88%         | 28%         | 67%         | 95%         | 88%         | 95%         | 92%         |
| HNO3_M                                                                | 92%         | 96%         | 97%         | 92%         | 0%          | 95%         | 95%         | 97%         | 96%         | 97%         | 97%         |
| HNO4_M                                                                | 59%         | 87%         | 74%         | 67%         | 0%          | 90%         | 85%         | 67%         | 88%         | 73%         | 66%         |
| PAN_M                                                                 | 78%         | 67%         | 48%         | 90%         | 40%         | 87%         | 97%         | 93%         | 98%         | 92%         | 95%         |
| CH2O_M                                                                | 99%         | 100%        | 100%        | 100%        | 100%        | 100%        | 100%        | 100%        | 100%        | 100%        | 100%        |
| H2O2_M                                                                | 92%         | 96%         | 97%         | 92%         | 0%          | 95%         | 95%         | 97%         | 96%         | 97%         | 97%         |
| CH3OOH_M                                                              | 56%         | 69%         | 81%         | 83%         | 84%         | 79%         | 81%         | 82%         | 82%         | 79%         | 79%         |
| Acetone_M                                                             | 89%         | 92%         | 88%         | 98%         | 92%         | 90%         | 93%         | 94%         | 94%         | 94%         | 94%         |
| Acetald_M                                                             | 89%         | 92%         | 88%         | 98%         | 90%         | 90%         | 90%         | 94%         | 93%         | 94%         | 94%         |
| C2H6_M                                                                | 50%         | 32%         | 43%         | 44%         | 62%         | 37%         | 39%         | 43%         | 40%         | 46%         | 45%         |
| C3H8_M                                                                | 90%         | 95%         | 92%         | 97%         | 97%         | 95%         | 96%         | 97%         | 96%         | 98%         | 95%         |
| iC4H10_M                                                              | 95%         | 95%         | 92%         | 98%         | 97%         | 95%         | 96%         | 97%         | 98%         | 98%         | 96%         |
| nC4H10_M                                                              | 95%         | 95%         | 92%         | 98%         | 97%         | 95%         | 96%         | 97%         | 98%         | 98%         | 96%         |
| Alkanes_M                                                             | 50%         | 32%         | 43%         | 44%         | 62%         | 37%         | 39%         | 43%         | 40%         | 46%         | 45%         |
| C2H4_M                                                                | 50%         | 32%         | 43%         | 44%         | 62%         | 37%         | 39%         | 43%         | 40%         | 46%         | 45%         |
| Alkenes_M                                                             | 50%         | 32%         | 43%         | 44%         | 62%         | 37%         | 39%         | 43%         | 40%         | 46%         | 45%         |
| C2H2_M                                                                | 50%         | 32%         | 43%         | 44%         | 62%         | 37%         | 39%         | 43%         | 40%         | 46%         | 45%         |
| C5H8_M                                                                | 95%         | 95%         | 92%         | 98%         | 97%         | 95%         | 96%         | 97%         | 98%         | 98%         | 96%         |
| Benzene_M                                                             | 95%         | 95%         | 92%         | 98%         | 97%         | 95%         | 96%         | 97%         | 98%         | 98%         | 96%         |
| Toluene_M                                                             | 100%        | 99%         | 94%         | 98%         | 98%         | 99%         | 100%        | 99%         | 100%        | 100%        | 99%         |
| Xylene_M                                                              | 100%        | 99%         | 94%         | 98%         | 98%         | 99%         | 100%        | 99%         | 100%        | 100%        | 99%         |
| MeONO2_M                                                              | 50%         | 32%         | 43%         | 44%         | 55%         | 37%         | 39%         | 43%         | 33%         | 43%         | 43%         |
| EtONO2_M                                                              | 50%         | 31%         | 40%         | 43%         | 47%         | 28%         | 34%         | 42%         | 31%         | 39%         | 39%         |
| RONO2_M                                                               | 50%         | 32%         | 43%         | 44%         | 62%         | 37%         | 39%         | 43%         | 40%         | 46%         | 45%         |
| MeOH_M                                                                | 89%         | 92%         | 88%         | 98%         | 92%         | 90%         | 92%         | 92%         | 92%         | 94%         | 94%         |
| HCN_M                                                                 | 98%         | 100%        | 100%        | 100%        | 92%         | 100%        | 100%        | 100%        | 100%        | 100%        | 100%        |
| CH3CN_M                                                               | 89%         | 92%         | 88%         | 98%         | 92%         | 90%         | 93%         | 94%         | 94%         | 94%         | 91%         |
| SF6_M                                                                 | 90%         | 88%         | 98%         | 92%         | 91%         | 80%         | 96%         | 79%         | 99%         | 90%         | 84%         |
| S_nuc_M                                                               | 95%         | 92%         | 93%         | 99%         | 92%         | 87%         | 91%         | 94%         | 91%         | 88%         | 93%         |
| S_atk_M                                                               | 95%         | 92%         | 93%         | 99%         | 92%         | 87%         | 91%         | 94%         | 91%         | 88%         | 93%         |
| S_acc_M                                                               | 95%         | 92%         | 93%         | 99%         | 92%         | 87%         | 91%         | 93%         | 91%         | 88%         | 93%         |
| S_crs_M                                                               | 95%         | 92%         | 93%         | 99%         | 92%         | 87%         | 91%         | 93%         | 91%         | 88%         | 93%         |
| CloudInd_M                                                            | 100%        | 100%        | 100%        | 100%        | 99%         | 100%        | 100%        | 100%        | 100%        | 100%        | 100%        |



| <b>Table S3b. ATom-2, % of non-NaNs after short-gap interpolation</b> |             |             |             |             |             |             |             |             |             |             |             |
|-----------------------------------------------------------------------|-------------|-------------|-------------|-------------|-------------|-------------|-------------|-------------|-------------|-------------|-------------|
| <b>RRno</b>                                                           | <b>12</b>   | <b>13</b>   | <b>14</b>   | <b>15</b>   | <b>16</b>   | <b>17</b>   | <b>18</b>   | <b>19</b>   | <b>20</b>   | <b>21</b>   | <b>22</b>   |
| <Lat> (deg)                                                           | 18          | 55          | 40          | 0           | -41         | -58         | -32         | 15          | 60          | 73          | 45          |
| <Lng> (deg)                                                           | -120        | -142        | -154        | -46         | 138         | -89         | -37         | -28         | -38         | -129        | -135        |
| <Alt> (m)                                                             | 8477        | 6915        | 5726        | 7514        | 7233        | 7629        | 8835        | 6832        | 5869        | 5553        | 6969        |
| <b># parcels</b>                                                      | <b>3678</b> | <b>3419</b> | <b>2880</b> | <b>3357</b> | <b>3057</b> | <b>3493</b> | <b>3123</b> | <b>3056</b> | <b>2642</b> | <b>2674</b> | <b>2045</b> |
| H2O_M                                                                 | 100%        | 100%        | 100%        | 100%        | 100%        | 100%        | 100%        | 100%        | 100%        | 100%        | 100%        |
| RHw_M                                                                 | 100%        | 100%        | 100%        | 100%        | 100%        | 100%        | 100%        | 100%        | 100%        | 100%        | 100%        |
| O3_M                                                                  | 99%         | 100%        | 100%        | 100%        | 100%        | 100%        | 100%        | 100%        | 100%        | 100%        | 100%        |
| CO_M                                                                  | 100%        | 100%        | 100%        | 100%        | 100%        | 100%        | 100%        | 100%        | 100%        | 100%        | 100%        |
| CH4_M                                                                 | 100%        | 100%        | 100%        | 99%         | 98%         | 99%         | 100%        | 100%        | 100%        | 99%         | 100%        |
| NOx_M                                                                 | 85%         | 89%         | 100%        | 95%         | 82%         | 82%         | 87%         | 80%         | 82%         | 100%        | 96%         |
| NOxPSS_M                                                              |             |             |             |             |             |             |             |             |             |             |             |
| HNO3_M                                                                | 90%         | 0%          | 91%         | 95%         | 96%         | 92%         | 97%         | 97%         | 97%         | 93%         | 98%         |
| HNO4_M                                                                | 82%         | 0%          | 77%         | 70%         | 77%         | 81%         | 87%         | 77%         | 87%         | 93%         | 94%         |
| PAN_M                                                                 | 84%         | 100%        | 100%        | 95%         | 100%        | 100%        | 99%         | 97%         | 94%         | 100%        | 94%         |
| CH2O_M                                                                | 100%        | 100%        | 100%        | 100%        | 100%        | 100%        | 100%        | 100%        | 100%        | 100%        | 100%        |
| H2O2_M                                                                | 90%         | 0%          | 91%         | 95%         | 96%         | 92%         | 97%         | 97%         | 97%         | 93%         | 98%         |
| CH3OOH_M                                                              | 67%         | 62%         | 71%         | 67%         | 65%         | 58%         | 58%         | 59%         | 58%         | 60%         | 56%         |
| Acetone_M                                                             | 91%         | 92%         | 85%         | 97%         | 96%         | 93%         | 95%         | 96%         | 89%         | 91%         | 94%         |
| Acetald_M                                                             | 91%         | 92%         | 85%         | 97%         | 96%         | 93%         | 95%         | 97%         | 89%         | 91%         | 94%         |
| C2H6_M                                                                | 38%         | 28%         | 45%         | 36%         | 42%         | 43%         | 40%         | 47%         | 56%         | 58%         | 61%         |
| C3H8_M                                                                | 95%         | 88%         | 81%         | 94%         | 94%         | 93%         | 87%         | 87%         | 87%         | 58%         | 88%         |
| iC4H10_M                                                              | 97%         | 94%         | 91%         | 97%         | 97%         | 95%         | 95%         | 97%         | 94%         | 95%         | 97%         |
| nC4H10_M                                                              | 97%         | 94%         | 91%         | 97%         | 97%         | 95%         | 95%         | 97%         | 94%         | 95%         | 97%         |
| Alkanes_M                                                             | 38%         | 28%         | 45%         | 36%         | 42%         | 43%         | 40%         | 47%         | 56%         | 58%         | 61%         |
| C2H4_M                                                                | 38%         | 28%         | 45%         | 36%         | 42%         | 43%         | 40%         | 47%         | 56%         | 58%         | 61%         |
| Alkenes_M                                                             | 38%         | 28%         | 45%         | 36%         | 42%         | 43%         | 40%         | 47%         | 56%         | 58%         | 61%         |
| C2H2_M                                                                | 38%         | 28%         | 45%         | 36%         | 42%         | 43%         | 40%         | 47%         | 56%         | 58%         | 61%         |
| C5H8_M                                                                | 97%         | 94%         | 93%         | 97%         | 97%         | 95%         | 96%         | 98%         | 94%         | 96%         | 97%         |
| Benzene_M                                                             | 97%         | 94%         | 93%         | 97%         | 97%         | 95%         | 96%         | 98%         | 94%         | 96%         | 97%         |
| Toluene_M                                                             | 100%        | 96%         | 96%         | 100%        | 100%        | 100%        | 100%        | 100%        | 98%         | 100%        | 100%        |
| Xylene_M                                                              | 100%        | 96%         | 96%         | 100%        | 100%        | 100%        | 100%        | 100%        | 98%         | 100%        | 100%        |
| MeONO2_M                                                              | 37%         | 26%         | 45%         | 36%         | 38%         | 35%         | 40%         | 47%         | 53%         | 54%         | 51%         |
| EtONO2_M                                                              | 37%         | 26%         | 45%         | 36%         | 38%         | 35%         | 40%         | 47%         | 52%         | 54%         | 50%         |
| RONO2_M                                                               | 38%         | 28%         | 45%         | 36%         | 42%         | 43%         | 40%         | 47%         | 56%         | 58%         | 61%         |
| MeOH_M                                                                | 90%         | 92%         | 83%         | 97%         | 92%         | 93%         | 95%         | 97%         | 89%         | 91%         | 94%         |
| HCN_M                                                                 | 99%         | 89%         | 100%        | 100%        | 100%        | 98%         | 100%        | 100%        | 100%        | 93%         | 100%        |
| CH3CN_M                                                               | 91%         | 92%         | 85%         | 97%         | 96%         | 93%         | 95%         | 97%         | 89%         | 87%         | 94%         |
| SF6_M                                                                 | 87%         | 97%         | 96%         | 88%         | 98%         | 99%         | 98%         | 99%         | 99%         | 99%         | 69%         |
| S_nuc_M                                                               | 86%         | 81%         | 98%         | 95%         | 85%         | 95%         | 85%         | 98%         | 75%         | 89%         | 91%         |
| S_atk_M                                                               | 86%         | 81%         | 98%         | 95%         | 85%         | 95%         | 85%         | 98%         | 75%         | 89%         | 91%         |
| S_acc_M                                                               | 86%         | 81%         | 97%         | 95%         | 84%         | 95%         | 85%         | 98%         | 75%         | 88%         | 91%         |
| S_crs_M                                                               | 86%         | 81%         | 97%         | 95%         | 84%         | 95%         | 85%         | 98%         | 75%         | 88%         | 91%         |
| CloudInd_M                                                            | 100%        | 100%        | 100%        | 97%         | 100%        | 100%        | 100%        | 100%        | 100%        | 100%        | 100%        |

| Table S3c. ATom-3, % of non-NaNs after short-gap interpolation |      |      |      |      |      |      |      |      |      |      |      |      |      |
|----------------------------------------------------------------|------|------|------|------|------|------|------|------|------|------|------|------|------|
| RRno                                                           | 23   | 24   | 25   | 26   | 27   | 28   | 29   | 30   | 31   | 32   | 33   | 34   | 35   |
| <Lat> (deg)                                                    | 18   | 55   | 42   | 4    | -41  | -58  | -67  | -32  | 4    | 22   | 55   | 67   | 46   |
| <Lng> (deg)                                                    | -121 | -141 | -158 | -14  | 63   | -91  | -50  | -36  | -19  | -26  | -43  | -105 | -136 |
| <Alt> (m)                                                      | 8988 | 7623 | 6720 | 6781 | 6844 | 6836 | 7263 | 8169 | 6678 | 6329 | 5522 | 6231 | 6033 |
| # parcels                                                      | 3658 | 3536 | 2607 | 3146 | 3246 | 3462 | 3763 | 3351 | 1615 | 2725 | 3356 | 3405 | 2306 |
| H2O_M                                                          | 100% | 100% | 100% | 100% | 100% | 100% | 100% | 100% | 100% | 100% | 100% | 100% | 100% |
| RHw_M                                                          | 100% | 100% | 100% | 100% | 100% | 100% | 100% | 100% | 100% | 100% | 100% | 100% | 100% |
| O3_M                                                           | 99%  | 100% | 100% | 100% | 100% | 100% | 100% | 100% | 89%  | 99%  | 100% | 100% | 100% |
| CO_M                                                           | 100% | 100% | 100% | 100% | 100% | 100% | 100% | 100% | 100% | 100% | 100% | 100% | 100% |
| CH4_M                                                          | 100% | 98%  | 100% | 100% | 100% | 100% | 100% | 100% | 100% | 100% | 100% | 100% | 100% |
| NOx_M                                                          | 0%   | 98%  | 100% | 100% | 97%  | 100% | 87%  | 94%  | 89%  | 94%  | 99%  | 100% | 100% |
| NOxPSS_M                                                       |      |      |      |      |      |      |      |      |      |      |      |      |      |
| HNO3_M                                                         | 96%  | 96%  | 96%  | 95%  | 97%  | 91%  | 94%  | 96%  | 91%  | 85%  | 97%  | 90%  | 66%  |
| HNO4_M                                                         | 0%   | 0%   | 0%   | 0%   | 0%   | 0%   | 0%   | 0%   | 0%   | 0%   | 0%   | 0%   | 0%   |
| PAN_M                                                          | 100% | 100% | 100% | 98%  | 100% | 100% | 99%  | 99%  | 100% | 98%  | 100% | 98%  | 100% |
| CH2O_M                                                         | 100% | 100% | 100% | 100% | 100% | 100% | 98%  | 100% | 100% | 100% | 100% | 100% | 100% |
| H2O2_M                                                         | 96%  | 96%  | 96%  | 95%  | 97%  | 91%  | 94%  | 96%  | 91%  | 85%  | 97%  | 90%  | 95%  |
| CH3OOH_M                                                       | 61%  | 59%  | 59%  | 60%  | 58%  | 58%  | 59%  | 61%  | 58%  | 53%  | 67%  | 60%  | 64%  |
| Acetone_M                                                      | 94%  | 95%  | 87%  | 95%  | 96%  | 97%  | 92%  | 96%  | 86%  | 93%  | 94%  | 98%  | 98%  |
| Acetald_M                                                      | 94%  | 95%  | 87%  | 97%  | 97%  | 97%  | 92%  | 96%  | 86%  | 96%  | 94%  | 98%  | 98%  |
| C2H6_M                                                         | 46%  | 47%  | 61%  | 57%  | 52%  | 48%  | 33%  | 33%  | 36%  | 33%  | 40%  | 39%  | 50%  |
| C3H8_M                                                         | 95%  | 97%  | 94%  | 98%  | 98%  | 98%  | 95%  | 97%  | 92%  | 96%  | 94%  | 98%  | 98%  |
| iC4H10_M                                                       | 95%  | 97%  | 94%  | 99%  | 98%  | 98%  | 95%  | 97%  | 91%  | 96%  | 94%  | 98%  | 98%  |
| nC4H10_M                                                       | 95%  | 97%  | 94%  | 99%  | 98%  | 98%  | 95%  | 97%  | 91%  | 96%  | 94%  | 98%  | 98%  |
| Alkanes_M                                                      | 46%  | 47%  | 61%  | 57%  | 52%  | 48%  | 34%  | 34%  | 39%  | 33%  | 40%  | 39%  | 50%  |
| C2H4_M                                                         | 46%  | 47%  | 61%  | 57%  | 52%  | 48%  | 34%  | 34%  | 39%  | 33%  | 40%  | 39%  | 50%  |
| Alkenes_M                                                      | 46%  | 47%  | 61%  | 57%  | 52%  | 48%  | 34%  | 34%  | 39%  | 33%  | 40%  | 39%  | 50%  |
| C2H2_M                                                         | 46%  | 47%  | 61%  | 57%  | 46%  | 46%  | 34%  | 33%  | 39%  | 33%  | 40%  | 39%  | 50%  |
| C5H8_M                                                         | 95%  | 97%  | 94%  | 99%  | 98%  | 98%  | 95%  | 97%  | 92%  | 96%  | 94%  | 98%  | 98%  |
| Benzene_M                                                      | 95%  | 97%  | 94%  | 99%  | 98%  | 98%  | 95%  | 97%  | 92%  | 96%  | 94%  | 98%  | 98%  |
| Toluene_M                                                      | 100% | 100% | 95%  | 100% | 100% | 100% | 99%  | 100% | 95%  | 100% | 100% | 100% | 100% |
| Xylene_M                                                       | 100% | 100% | 95%  | 100% | 100% | 100% | 99%  | 100% | 95%  | 100% | 100% | 100% | 100% |
| MeONO2_M                                                       | 46%  | 47%  | 61%  | 57%  | 52%  | 48%  | 34%  | 34%  | 39%  | 33%  | 40%  | 39%  | 50%  |
| EtONO2_M                                                       | 46%  | 47%  | 61%  | 57%  | 52%  | 48%  | 34%  | 34%  | 39%  | 33%  | 40%  | 39%  | 50%  |
| RONO2_M                                                        | 46%  | 47%  | 61%  | 57%  | 52%  | 48%  | 34%  | 34%  | 39%  | 33%  | 40%  | 39%  | 50%  |
| MeOH_M                                                         | 94%  | 95%  | 87%  | 97%  | 97%  | 97%  | 92%  | 96%  | 86%  | 96%  | 94%  | 98%  | 98%  |
| HCN_M                                                          | 100% | 99%  | 100% | 100% | 100% | 100% | 100% | 100% | 100% | 100% | 100% | 100% | 100% |
| CH3CN_M                                                        | 94%  | 95%  | 87%  | 96%  | 95%  | 97%  | 92%  | 96%  | 86%  | 95%  | 94%  | 98%  | 98%  |
| SF6_M                                                          | 77%  | 100% | 76%  | 84%  | 60%  | 96%  | 95%  | 83%  | 91%  | 99%  | 97%  | 82%  | 92%  |
| S_nuc_M                                                        | 92%  | 77%  | 74%  | 94%  | 91%  | 86%  | 92%  | 91%  | 99%  | 88%  | 91%  | 81%  | 92%  |
| S_atk_M                                                        | 92%  | 77%  | 74%  | 94%  | 91%  | 86%  | 92%  | 91%  | 99%  | 88%  | 91%  | 81%  | 92%  |
| S_acc_M                                                        | 92%  | 77%  | 67%  | 94%  | 91%  | 86%  | 91%  | 91%  | 99%  | 88%  | 91%  | 81%  | 91%  |
| S_crs_M                                                        | 92%  | 77%  | 67%  | 94%  | 91%  | 86%  | 91%  | 91%  | 99%  | 88%  | 91%  | 81%  | 91%  |
| CloudInd_M                                                     | 98%  | 100% | 100% | 100% | 100% | 100% | 100% | 100% | 100% | 100% | 100% | 99%  | 100% |

| Table S3d. ATom-4, % of non-NaNs after short-gap interpolation |      |      |      |      |      |      |      |      |      |      |      |      |      |
|----------------------------------------------------------------|------|------|------|------|------|------|------|------|------|------|------|------|------|
| RRno                                                           | 36   | 37   | 38   | 39   | 40   | 41   | 42   | 43   | 44   | 45   | 46   | 47   | 48   |
| <Lat> (deg)                                                    | 19   | 56   | 42   | 3    | -38  | -59  | -70  | -32  | 13   | 60   | 56   | 67   | 46   |
| <Lng> (deg)                                                    | -121 | -141 | -158 | -132 | 10   | -93  | -59  | -41  | -27  | -37  | -62  | -105 | -135 |
| <Alt> (m)                                                      | 8278 | 6678 | 6123 | 6419 | 5922 | 6843 | 7197 | 6672 | 6729 | 7019 | 9678 | 6759 | 5935 |
| # parcels                                                      | 3374 | 3671 | 2819 | 2894 | 2801 | 3580 | 3812 | 3529 | 3307 | 3440 | 1106 | 3779 | 2399 |
| H2O_M                                                          | 100% | 100% | 100% | 100% | 100% | 100% | 100% | 100% | 100% | 100% | 100% | 100% | 100% |
| RHw_M                                                          | 100% | 100% | 100% | 100% | 100% | 100% | 100% | 100% | 100% | 100% | 100% | 100% | 100% |
| O3_M                                                           | 100% | 100% | 100% | 100% | 100% | 100% | 99%  | 100% | 100% | 100% | 0%   | 100% | 100% |
| CO_M                                                           | 100% | 100% | 100% | 100% | 100% | 100% | 100% | 100% | 100% | 100% | 100% | 100% | 100% |
| CH4_M                                                          | 100% | 100% | 100% | 100% | 100% | 100% | 100% | 100% | 100% | 100% | 100% | 100% | 100% |
| NOx_M                                                          | 62%  | 77%  | 93%  | 84%  | 99%  | 100% | 89%  | 100% | 100% | 99%  | 100% | 100% | 100% |
| NOxPSS_M                                                       |      |      |      |      |      |      |      |      |      |      |      |      |      |
| HNO3_M                                                         | 93%  | 94%  | 98%  | 75%  | 95%  | 96%  | 96%  | 96%  | 96%  | 97%  | 96%  | 96%  | 98%  |
| HNO4_M                                                         | 0%   | 0%   | 0%   | 0%   | 0%   | 0%   | 0%   | 0%   | 0%   | 0%   | 0%   | 0%   | 0%   |
| PAN_M                                                          | 99%  | 92%  | 100% | 100% | 99%  | 100% | 100% | 100% | 100% | 100% | 83%  | 100% | 100% |
| CH2O_M                                                         | 100% | 82%  | 100% | 100% | 98%  | 100% | 98%  | 98%  | 98%  | 96%  | 0%   | 95%  | 93%  |
| H2O2_M                                                         | 94%  | 94%  | 98%  | 75%  | 95%  | 96%  | 96%  | 96%  | 96%  | 97%  | 96%  | 96%  | 98%  |
| CH3OOH_M                                                       | 43%  | 59%  | 59%  | 59%  | 0%   | 0%   | 0%   | 0%   | 0%   | 69%  | 67%  | 0%   | 0%   |
| Acetone_M                                                      | 96%  | 98%  | 98%  | 88%  | 98%  | 96%  | 98%  | 98%  | 98%  | 97%  | 0%   | 95%  | 93%  |
| Acetald_M                                                      | 96%  | 87%  | 97%  | 88%  | 92%  | 91%  | 94%  | 97%  | 93%  | 89%  | 0%   | 95%  | 92%  |
| C2H6_M                                                         | 26%  | 35%  | 40%  | 40%  | 46%  | 34%  | 31%  | 28%  | 31%  | 29%  | 0%   | 27%  | 31%  |
| C3H8_M                                                         | 96%  | 99%  | 99%  | 94%  | 100% | 97%  | 98%  | 98%  | 98%  | 97%  | 0%   | 96%  | 95%  |
| iC4H10_M                                                       | 96%  | 99%  | 99%  | 94%  | 100% | 97%  | 98%  | 98%  | 98%  | 97%  | 0%   | 96%  | 95%  |
| nC4H10_M                                                       | 96%  | 99%  | 99%  | 94%  | 100% | 97%  | 98%  | 98%  | 98%  | 97%  | 0%   | 96%  | 95%  |
| Alkanes_M                                                      | 26%  | 35%  | 42%  | 43%  | 46%  | 34%  | 33%  | 28%  | 31%  | 29%  | 0%   | 27%  | 31%  |
| C2H4_M                                                         | 26%  | 35%  | 42%  | 43%  | 46%  | 34%  | 33%  | 28%  | 31%  | 29%  | 0%   | 27%  | 31%  |
| Alkenes_M                                                      | 26%  | 35%  | 42%  | 43%  | 46%  | 34%  | 33%  | 28%  | 31%  | 29%  | 0%   | 27%  | 31%  |
| C2H2_M                                                         | 26%  | 35%  | 42%  | 43%  | 46%  | 34%  | 33%  | 28%  | 31%  | 29%  | 0%   | 27%  | 31%  |
| C5H8_M                                                         | 96%  | 99%  | 99%  | 94%  | 100% | 97%  | 98%  | 98%  | 98%  | 97%  | 0%   | 96%  | 95%  |
| Benzene_M                                                      | 96%  | 99%  | 99%  | 94%  | 100% | 97%  | 98%  | 98%  | 98%  | 97%  | 0%   | 96%  | 95%  |
| Toluene_M                                                      | 100% | 100% | 99%  | 95%  | 100% | 100% | 100% | 100% | 100% | 100% | 0%   | 100% | 100% |
| Xylene_M                                                       | 100% | 100% | 99%  | 95%  | 100% | 100% | 100% | 100% | 100% | 100% | 0%   | 100% | 100% |
| MeONO2_M                                                       | 26%  | 35%  | 42%  | 43%  | 46%  | 34%  | 33%  | 28%  | 31%  | 29%  | 0%   | 27%  | 31%  |
| EtONO2_M                                                       | 26%  | 35%  | 42%  | 43%  | 46%  | 34%  | 33%  | 28%  | 31%  | 29%  | 0%   | 27%  | 31%  |
| RONO2_M                                                        | 26%  | 35%  | 42%  | 43%  | 46%  | 34%  | 33%  | 28%  | 31%  | 29%  | 0%   | 27%  | 31%  |
| MeOH_M                                                         | 96%  | 98%  | 98%  | 88%  | 98%  | 96%  | 98%  | 98%  | 98%  | 97%  | 0%   | 95%  | 93%  |
| HCN_M                                                          | 99%  | 100% | 100% | 95%  | 99%  | 100% | 100% | 99%  | 99%  | 100% | 96%  | 100% | 100% |
| CH3CN_M                                                        | 96%  | 98%  | 98%  | 88%  | 98%  | 96%  | 98%  | 98%  | 98%  | 97%  | 0%   | 95%  | 93%  |
| SF6_M                                                          | 76%  | 92%  | 97%  | 95%  | 97%  | 85%  | 90%  | 98%  | 88%  | 85%  | 94%  | 97%  | 94%  |
| S_nuc_M                                                        | 94%  | 99%  | 89%  | 94%  | 96%  | 82%  | 81%  | 96%  | 98%  | 65%  | 85%  | 93%  | 94%  |
| S_atk_M                                                        | 94%  | 99%  | 89%  | 94%  | 96%  | 82%  | 81%  | 96%  | 98%  | 65%  | 85%  | 93%  | 94%  |
| S_acc_M                                                        | 94%  | 99%  | 88%  | 94%  | 96%  | 82%  | 81%  | 95%  | 98%  | 65%  | 85%  | 92%  | 94%  |
| S_crs_M                                                        | 94%  | 99%  | 88%  | 94%  | 96%  | 82%  | 81%  | 95%  | 98%  | 65%  | 85%  | 92%  | 94%  |
| CloudInd_M                                                     | 100% | 100% | 100% | 100% | 100% | 100% | 99%  | 94%  | 100% | 100% | 100% | 100% | 99%  |

| <b>Table S4. ATom, % of records by flag</b>                                                     |           |          |          |          |          |          |          |
|-------------------------------------------------------------------------------------------------|-----------|----------|----------|----------|----------|----------|----------|
| <b>Flags</b>                                                                                    | <b>0*</b> | <b>1</b> | <b>2</b> | <b>3</b> | <b>4</b> | <b>5</b> | <b>6</b> |
| H2O_M                                                                                           | 0.8%      | 99.0%    | 0.0%     | 0.3%     | 0.0%     | 0.0%     | 0.0%     |
| RHw_M                                                                                           | 0.8%      | 99.0%    | 0.0%     | 0.3%     | 0.0%     | 0.0%     | 0.0%     |
| O3_M                                                                                            | 0.8%      | 98.6%    | 0.0%     | 0.3%     | 0.3%     | 0.0%     | 0.0%     |
| CO_M                                                                                            | 0.8%      | 79.4%    | 19.4%    | 0.1%     | 0.5%     | 0.0%     | 0.0%     |
| CH4_M                                                                                           | 0.8%      | 93.5%    | 1.3%     | 1.9%     | 2.5%     | 0.0%     | 0.0%     |
| NOx_M                                                                                           | 0.8%      | 80.8%    | 0.0%     | 8.3%     | 7.6%     | 2.5%     | 0.0%     |
| NOxPSS_M                                                                                        | 0.8%      | 82.4%    | 0.0%     | 11.8%    | 5.1%     | 0.0%     | 0.0%     |
| HNO3_M                                                                                          | 0.8%      | 78.0%    | 0.0%     | 11.6%    | 5.7%     | 3.9%     | 0.0%     |
| HNO4_M                                                                                          | 0.8%      | 28.5%    | 0.0%     | 4.0%     | 8.5%     | 58.3%    | 0.0%     |
| PAN_M                                                                                           | 0.8%      | 58.0%    | 28.4%    | 7.5%     | 5.4%     | 0.0%     | 0.0%     |
| CH2O_M                                                                                          | 0.8%      | 82.9%    | 14.9%    | 0.3%     | 1.1%     | 0.0%     | 0.0%     |
| H2O2_M                                                                                          | 0.8%      | 78.5%    | 0.0%     | 11.6%    | 5.3%     | 3.9%     | 0.0%     |
| CH3OOH_M                                                                                        | 0.8%      | 42.0%    | 0.0%     | 12.0%    | 29.4%    | 15.8%    | 0.0%     |
| Acetone_M                                                                                       | 0.8%      | 31.7%    | 0.0%     | 61.6%    | 6.0%     | 0.0%     | 0.0%     |
| Acetald_M                                                                                       | 0.8%      | 31.4%    | 0.0%     | 60.9%    | 6.9%     | 0.0%     | 0.0%     |
| C2H6_M                                                                                          | 0.8%      | 28.0%    | 0.0%     | 12.4%    | 56.3%    | 0.0%     | 2.5%     |
| C3H8_M                                                                                          | 0.8%      | 28.0%    | 53.1%    | 12.5%    | 5.1%     | 0.0%     | 0.7%     |
| iC4H10_M                                                                                        | 0.8%      | 28.1%    | 54.9%    | 12.5%    | 3.2%     | 0.0%     | 0.5%     |
| nC4H10_M                                                                                        | 0.8%      | 28.1%    | 54.9%    | 12.5%    | 3.2%     | 0.0%     | 0.5%     |
| Alkanes_M                                                                                       | 0.8%      | 28.1%    | 0.0%     | 12.5%    | 56.0%    | 0.0%     | 2.6%     |
| C2H4_M                                                                                          | 0.8%      | 28.1%    | 0.0%     | 12.5%    | 56.0%    | 0.0%     | 2.6%     |
| Alkenes_M                                                                                       | 0.8%      | 28.1%    | 0.0%     | 12.5%    | 56.0%    | 0.0%     | 2.6%     |
| C2H2_M                                                                                          | 0.8%      | 28.0%    | 0.0%     | 12.5%    | 56.2%    | 0.0%     | 2.6%     |
| C5H8_M                                                                                          | 0.8%      | 31.8%    | 2.3%     | 61.7%    | 3.1%     | 0.0%     | 0.5%     |
| Benzene_M                                                                                       | 0.8%      | 31.8%    | 2.3%     | 61.7%    | 3.1%     | 0.0%     | 0.5%     |
| Toluene_M                                                                                       | 0.8%      | 33.0%    | 0.6%     | 64.8%    | 0.6%     | 0.0%     | 0.2%     |
| Xylene_M                                                                                        | 0.8%      | 33.0%    | 0.6%     | 64.8%    | 0.6%     | 0.0%     | 0.2%     |
| MeONO2_M                                                                                        | 0.8%      | 27.4%    | 0.0%     | 12.3%    | 57.0%    | 0.0%     | 2.6%     |
| EtONO2_M                                                                                        | 0.8%      | 26.8%    | 0.0%     | 12.1%    | 57.8%    | 0.0%     | 2.6%     |
| RONO2_M                                                                                         | 0.8%      | 28.1%    | 0.0%     | 12.5%    | 56.0%    | 0.0%     | 2.6%     |
| MeOH_M                                                                                          | 0.8%      | 31.7%    | 0.0%     | 61.5%    | 6.0%     | 0.0%     | 0.0%     |
| HCN_M                                                                                           | 0.8%      | 78.5%    | 8.3%     | 11.6%    | 0.8%     | 0.0%     | 0.0%     |
| CH3CN_M                                                                                         | 0.8%      | 31.7%    | 0.0%     | 61.5%    | 6.0%     | 0.0%     | 0.0%     |
| SF6_M                                                                                           | 0.8%      | 10.4%    | 5.8%     | 79.2%    | 3.8%     | 0.0%     | 0.0%     |
| S_nuc_M                                                                                         | 0.8%      | 84.6%    | 0.0%     | 4.4%     | 10.3%    | 0.0%     | 0.0%     |
| S_atk_M                                                                                         | 0.8%      | 84.6%    | 0.0%     | 4.4%     | 10.3%    | 0.0%     | 0.0%     |
| S_acc_M                                                                                         | 0.8%      | 84.1%    | 0.0%     | 4.6%     | 10.6%    | 0.0%     | 0.0%     |
| S_crs_M                                                                                         | 0.8%      | 84.1%    | 0.0%     | 4.6%     | 10.6%    | 0.0%     | 0.0%     |
| CloudInd_M                                                                                      | 0.8%      | 98.7%    | 0.0%     | 0.2%     | 0.3%     | 0.0%     | 0.0%     |
| * The 0.8% flag=0 corresponds to the short flight RF #46, for which we NaN'd all chemical data. |           |          |          |          |          |          |          |

580  
581

| <b>Table S5. Test of long-gap interpolation method</b> |             |                               |                     |                     |
|--------------------------------------------------------|-------------|-------------------------------|---------------------|---------------------|
| Species                                                | All parcels | Long-gap interpolated parcels |                     | Short-gap fill      |
| (ppt unless noted)                                     | mean        | bias<br>(% of mean)           | RMSE<br>(% of mean) | RMSE<br>(% of mean) |
| H2O_M (ppm)                                            | 336         |                               |                     | 16%                 |
| RHw_M (%)                                              | 40          |                               |                     | 12%                 |
| O3_M (ppb)                                             | 80          | 3%                            | 12%                 | 6%                  |
| CO_M (ppb)                                             | 80          | 1%                            | 8%                  | 3%                  |
| CH4_M (ppb)                                            | 1850        | <1%                           | <1%                 | <1%                 |
| NOx_M                                                  | 64          | -8%                           | 44%                 | 22%                 |
| NOxPSS_M                                               | 46          | -17%                          | 70%                 | 25%                 |
| HNO3_M                                                 | 162         | -6%                           | 22%                 | 12%                 |
| HNO4_M                                                 | 26          | -7%                           | 54%                 | 28%                 |
| PAN_M                                                  | 87          | 6%                            | 25%                 | 14%                 |
| CH2O_M                                                 | 140         | 6%                            | 22%                 | 11%                 |
| H2O2_M                                                 | 250         | 9%                            | 30%                 | 16%                 |
| CH3OOH_M                                               | 381         | 12%                           | 45%                 | 21%                 |
| Acetone_M                                              | 351         | 3%                            | 18%                 |                     |
| Acetald_M                                              | 56          | 3%                            | 19%                 |                     |
| C2H6_M                                                 | 644         | 2%                            | 16%                 |                     |
| C3H8_M                                                 | 109         | 3%                            | 16%                 |                     |
| iC4H10_M                                               | 11          | 6%                            | 29%                 |                     |
| nC4H10_M                                               | 21          | 5%                            | 29%                 |                     |
| Alkanes_M                                              | 16          | 3%                            | 33%                 |                     |
| C2H4_M                                                 | 6           | 28%                           | 94%                 |                     |
| Alkenes_M                                              | 0.2         | 17%                           | 78%                 |                     |
| C2H2_M                                                 | 97          | 10%                           | 42%                 |                     |
| C5H8_M                                                 | 0.5         | 16%                           | 70%                 |                     |
| Benzene_M                                              | 15          | -12%                          | 33%                 |                     |
| Toluene_M                                              | 1           | 4%                            | 28%                 |                     |
| Xylene_M                                               | 0.1         | 33%                           | 97%                 |                     |
| MeONO2_M                                               | 9           | -11%                          | 29%                 |                     |
| EtONO2_M                                               | 2           | -11%                          | 33%                 |                     |
| RONO2_M                                                | 5           | -5%                           | 37%                 |                     |
| MeOH_M                                                 | 590         | 3%                            | 38%                 |                     |
| HCN_M                                                  | 185         | 5%                            | 31%                 | 10%                 |
| CH3CN_M                                                | 114         | 11%                           | 44%                 |                     |
| SF6_M                                                  | 9           | <1%                           | 1%                  | <1%                 |

585  
586

| <b>Table S6.</b> Test of missing flight data                                                                                                                                                                                                                                                   |             |                     |                                         |
|------------------------------------------------------------------------------------------------------------------------------------------------------------------------------------------------------------------------------------------------------------------------------------------------|-------------|---------------------|-----------------------------------------|
| Missing data                                                                                                                                                                                                                                                                                   | All parcels | Interpolated        | Flights used                            |
| (ppt unless noted)                                                                                                                                                                                                                                                                             | Mean (ppt)  | RMSE<br>(% of mean) |                                         |
| <i><b>ATom-1 RF-5</b></i>                                                                                                                                                                                                                                                                      |             |                     |                                         |
| H2O2_M                                                                                                                                                                                                                                                                                         | 392         | 24%                 | AT-1 RF4, AT-2/3/4 RF-4/5               |
| HNO3_M                                                                                                                                                                                                                                                                                         | 139         | 58%                 | AT-1 RF4, AT-2/3/4 RF-4/5               |
| HNO4_M                                                                                                                                                                                                                                                                                         | 30.2        | 66%                 | AT-1 RF4, AT-2 RF-4/5                   |
| <i><b>ATom-2 RF-2</b></i>                                                                                                                                                                                                                                                                      |             |                     |                                         |
| H2O2_M                                                                                                                                                                                                                                                                                         | 125         | 23%                 | AT-2 RF-3, AT-1/3/4 RF-2/3              |
| HNO3_M                                                                                                                                                                                                                                                                                         | 30.9        | 52%                 | AT-2 RF-3, AT-1/3/4 RF-2/3              |
| HNO4_M                                                                                                                                                                                                                                                                                         | 14.3        | 63%                 | AT-2 RF-3, AT-1 RF-2/3                  |
| <i><b>ATom-3 RF-1</b></i>                                                                                                                                                                                                                                                                      |             |                     |                                         |
| NOx_M                                                                                                                                                                                                                                                                                          | 80.9        | 55%                 | AT-3 RF-2, AT-1/2/4 RF-1/2              |
| <i><b>ATom-3/4 all</b></i>                                                                                                                                                                                                                                                                     |             |                     |                                         |
| HNO4_M                                                                                                                                                                                                                                                                                         | 26.1        | 105%                | AT-1/2 all                              |
| <i><b>ATom-4 RF-5/6/7/8/9/12/13</b></i>                                                                                                                                                                                                                                                        |             |                     |                                         |
| CH3OOH_M                                                                                                                                                                                                                                                                                       | 336         | 72%                 | AT-1/2 RF-5:11, AT-3 RF-5:13, AT-4 RF-4 |
| Notes: Missing flight data are filled using a multiple linear regression from other flights based on the explanatory variables: pressure, noontime solar zenith angle, and latitude (in that order). RMSE is calculated from the residuals of this fit for the flights used in the regression. |             |                     |                                         |

587  
588

| <b>Table S7. Chemistry models</b> |      |            |      |                             |                      |                                           |                            |
|-----------------------------------|------|------------|------|-----------------------------|----------------------|-------------------------------------------|----------------------------|
| Used in                           | ID   | Model name | Type | Meteorology                 | Model Grid           | References                                | Point of Contact           |
| clim, R0                          | GFDL | GFDL-AM3   | CCM  | NCEP (nudged)               | C180 x L48           | Horowitz et al., 2003; Li et al. 2017     | amfiore @ldeo.columbia.edu |
| clim, R0                          | GISS | GISS-E2.1  | CCM  | Daily SSTs, nudged to MERRA | 2° x 2.5° x 40L      | Rienecker et al.,                         | lee.murray @rochester.edu  |
| clim, R0, R1                      | GMI  | GMI-CTM    | CTM  | MERRA                       | 1° x 1.25° x 72L     | Strahan et al., 2013; Duncan et al., 2007 | Sarah.A.Strode @nasa.gov   |
| clim, R0                          | GC   | GEOS-Chem  | CTM  | MERRA-2                     | 2° x 2.5° x 72L      | Gelaro et al., 2017                       | lee.murray @rochester.edu  |
| clim, R0                          | NCAR | CAM4-Chem  | CCM  | MERRA                       | 0.47° x 0.625° x 52L | Tilmes et al., 2016                       | emmons @ucar.edu           |
| clim, R0, R1, R2                  | UCI  | UCI-CTM    | CTM  | ECMWF IFS Cy38r1            | T159N80 x L60        | Holmes et al., 2017; Prather 2015         | mprather @uci.edu          |
| R0                                | F0AM | F0AM       | box  | MDS+scaled ATom Js          | N/A                  | Wolfe et al., 2016                        | glenn.m.wolfe @nasa.gov    |

| <b>Table S8. Reactivity statistics and mean J-values for the 3 large domains (Global, Pacific, Atlantic).</b> |          |                |      |      |      |      |      |      |                 |           |
|---------------------------------------------------------------------------------------------------------------|----------|----------------|------|------|------|------|------|------|-----------------|-----------|
| Table S7a. Average Reactivity: mean, median, mean of top 10%                                                  |          |                |      |      |      |      |      |      |                 |           |
| Value                                                                                                         | Region   | Models with R0 |      |      |      |      |      |      | Models w/ R1/R2 |           |
|                                                                                                               |          | F0AM           | GC   | GISS | GMI  | NCAR | UCI  | U15  | U97             | GMI1 UCI2 |
| P-O3, mean, ppb/d                                                                                             |          |                |      |      |      |      |      |      |                 |           |
|                                                                                                               | Global   | 1.83           | 1.58 | 1.98 | 1.53 | 1.64 | 1.75 | 1.75 | 1.75            | 1.83      |
|                                                                                                               | Pacific  | 1.96           | 1.97 | 2.00 | 1.92 | 1.99 | 2.13 | 2.09 | 2.10            | 2.35      |
|                                                                                                               | Atlantic | 2.11           | 2.29 | 3.73 | 2.38 | 2.57 | 2.61 | 2.60 | 2.61            | 2.74      |
| P-O3, median, ppb/d                                                                                           |          |                |      |      |      |      |      |      |                 |           |
|                                                                                                               | Global   | 1.15           | 0.95 | 1.23 | 0.85 | 0.95 | 0.96 | 0.96 | 0.97            | 1.05      |
|                                                                                                               | Pacific  | 1.31           | 1.64 | 1.62 | 1.48 | 1.63 | 1.68 | 1.66 | 1.67            | 1.76      |
|                                                                                                               | Atlantic | 2.00           | 2.26 | 3.66 | 2.31 | 2.48 | 2.45 | 2.45 | 2.46            | 2.64      |
| P-O3, mean of top 10%, ppb/d                                                                                  |          |                |      |      |      |      |      |      |                 |           |
|                                                                                                               | Global   | 7.04           | 6.06 | 7.05 | 5.84 | 6.02 | 7.07 | 7.07 | 7.02            | 6.64      |
|                                                                                                               | Pacific  | 6.80           | 5.48 | 5.44 | 5.60 | 5.64 | 6.33 | 6.12 | 6.17            | 6.11      |
|                                                                                                               | Atlantic | 4.53           | 4.92 | 7.50 | 5.10 | 5.36 | 5.92 | 5.82 | 5.85            | 5.74      |
| L-O3, mean, ppb/d                                                                                             |          |                |      |      |      |      |      |      |                 |           |
|                                                                                                               | Global   | 1.55           | 1.17 | 1.39 | 1.22 | 1.24 | 1.27 | 1.27 | 1.27            | 1.23      |
|                                                                                                               | Pacific  | 1.62           | 1.46 | 1.69 | 1.49 | 1.52 | 1.53 | 1.49 | 1.51            | 1.48      |
|                                                                                                               | Atlantic | 2.32           | 2.17 | 2.57 | 2.36 | 2.43 | 2.48 | 2.47 | 2.49            | 2.39      |
| L-O3, median, ppb/d                                                                                           |          |                |      |      |      |      |      |      |                 |           |
|                                                                                                               | Global   | 0.67           | 0.43 | 0.55 | 0.43 | 0.49 | 0.47 | 0.47 | 0.47            | 0.43      |
|                                                                                                               | Pacific  | 0.93           | 0.88 | 1.10 | 0.88 | 0.99 | 0.94 | 0.94 | 0.94            | 0.85      |
|                                                                                                               | Atlantic | 1.98           | 1.76 | 2.28 | 2.01 | 1.98 | 2.04 | 2.05 | 2.04            | 2.05      |
| L-O3, mean of top 10%, ppb/d                                                                                  |          |                |      |      |      |      |      |      |                 |           |
|                                                                                                               | Global   | 5.99           | 5.10 | 5.75 | 5.32 | 5.37 | 5.64 | 5.64 | 5.66            | 5.53      |
|                                                                                                               | Pacific  | 5.88           | 5.00 | 5.41 | 5.17 | 5.04 | 5.24 | 5.09 | 5.18            | 5.26      |
|                                                                                                               | Atlantic | 5.90           | 5.42 | 6.35 | 5.93 | 6.74 | 6.35 | 6.32 | 6.37            | 5.98      |
| L-CH4, mean, ppb/d                                                                                            |          |                |      |      |      |      |      |      |                 |           |
|                                                                                                               | Global   | 0.68           | 0.53 | 0.32 | 0.52 | 0.51 | 0.55 | 0.55 | 0.55            | 0.55      |
|                                                                                                               | Pacific  | 0.81           | 0.76 | 0.39 | 0.74 | 0.75 | 0.77 | 0.75 | 0.76            | 0.77      |
|                                                                                                               | Atlantic | 0.90           | 0.88 | 0.57 | 0.92 | 0.90 | 0.95 | 0.95 | 0.95            | 0.96      |
| L-CH4, median, ppb/d                                                                                          |          |                |      |      |      |      |      |      |                 |           |
|                                                                                                               | Global   | 0.30           | 0.19 | 0.20 | 0.17 | 0.21 | 0.19 | 0.19 | 0.19            | 0.20      |
|                                                                                                               | Pacific  | 0.44           | 0.49 | 0.33 | 0.45 | 0.49 | 0.48 | 0.48 | 0.48            | 0.50      |
|                                                                                                               | Atlantic | 0.80           | 0.81 | 0.58 | 0.80 | 0.79 | 0.81 | 0.81 | 0.82            | 0.84      |
| L-CH4, mean of top 10%, ppb/d                                                                                 |          |                |      |      |      |      |      |      |                 |           |
|                                                                                                               | Global   | 2.52           | 2.10 | 1.04 | 2.11 | 1.99 | 2.28 | 2.27 | 2.28            | 2.25      |
|                                                                                                               | Pacific  | 2.79           | 2.31 | 1.01 | 2.35 | 2.27 | 2.41 | 2.33 | 2.37            | 2.42      |
|                                                                                                               | Atlantic | 2.21           | 1.96 | 1.10 | 2.14 | 2.17 | 2.30 | 2.25 | 2.30            | 2.26      |
| Table S7b. Percent of total Reactivity in the top 50%, top 10%, top 3% of parcels                             |          |                |      |      |      |      |      |      |                 |           |
| P-O3, % of total R in top 50%                                                                                 |          | F0AM           | GC   | GISS | GMI  | NCAR | UCI  | U15  | U97             | GMI1 UCI2 |
|                                                                                                               | Global   | 87%            | 92%  | 88%  | 92%  | 91%  | 92%  | 92%  | 92%             | 91%       |
|                                                                                                               | Pacific  | 84%            | 79%  | 77%  | 81%  | 80%  | 80%  | 80%  | 80%             | 78%       |
|                                                                                                               | Atlantic | 71%            | 72%  | 69%  | 71%  | 70%  | 72%  | 72%  | 72%             | 71%       |
| P-O3, % of total R in top 10%                                                                                 |          |                |      |      |      |      |      |      |                 |           |
|                                                                                                               | Global   | 38%            | 38%  | 36%  | 38%  | 37%  | 40%  | 40%  | 40%             | 38%       |
|                                                                                                               | Pacific  | 35%            | 28%  | 27%  | 29%  | 28%  | 30%  | 29%  | 29%             | 28%       |
|                                                                                                               | Atlantic | 22%            | 22%  | 20%  | 22%  | 21%  | 23%  | 23%  | 23%             | 21%       |



|                                                                                                                                                                                                                                                                                                         |          |      |      |      |      |      |      |      |     |     |     |
|---------------------------------------------------------------------------------------------------------------------------------------------------------------------------------------------------------------------------------------------------------------------------------------------------------|----------|------|------|------|------|------|------|------|-----|-----|-----|
| P-O3, %of total R in top 3%                                                                                                                                                                                                                                                                             |          |      |      |      |      |      |      |      |     |     |     |
|                                                                                                                                                                                                                                                                                                         | Global   | 19%  | 18%  | 17%  | 17%  | 17%  | 19%  | 19%  | 19% | 18% | 17% |
|                                                                                                                                                                                                                                                                                                         | Pacific  | 16%  | 12%  | 12%  | 12%  | 12%  | 13%  | 13%  | 13% | 11% | 11% |
|                                                                                                                                                                                                                                                                                                         | Atlantic | 9%   | 9%   | 8%   | 9%   | 8%   | 10%  | 9%   | 9%  | 8%  | 8%  |
| L-O3, % of total R in top 50%                                                                                                                                                                                                                                                                           |          |      |      |      |      |      |      |      |     |     |     |
|                                                                                                                                                                                                                                                                                                         | Global   | 92%  | 94%  | 93%  | 94%  | 93%  | 94%  | 94%  | 94% | 94% | 94% |
|                                                                                                                                                                                                                                                                                                         | Pacific  | 89%  | 87%  | 86%  | 88%  | 86%  | 87%  | 87%  | 87% | 87% | 87% |
|                                                                                                                                                                                                                                                                                                         | Atlantic | 83%  | 83%  | 82%  | 84%  | 82%  | 83%  | 83%  | 84% | 84% | 83% |
| L-O3, %of total R in top 10%                                                                                                                                                                                                                                                                            |          |      |      |      |      |      |      |      |     |     |     |
|                                                                                                                                                                                                                                                                                                         | Global   | 39%  | 44%  | 41%  | 44%  | 43%  | 45%  | 45%  | 45% | 45% | 44% |
|                                                                                                                                                                                                                                                                                                         | Pacific  | 36%  | 34%  | 32%  | 35%  | 33%  | 34%  | 34%  | 34% | 36% | 34% |
|                                                                                                                                                                                                                                                                                                         | Atlantic | 26%  | 25%  | 25%  | 25%  | 28%  | 26%  | 26%  | 26% | 25% | 26% |
| L-O3, %of total R in top 3%                                                                                                                                                                                                                                                                             |          |      |      |      |      |      |      |      |     |     |     |
|                                                                                                                                                                                                                                                                                                         | Global   | 15%  | 17%  | 17%  | 17%  | 19%  | 18%  | 18%  | 18% | 18% | 18% |
|                                                                                                                                                                                                                                                                                                         | Pacific  | 15%  | 14%  | 13%  | 15%  | 14%  | 14%  | 14%  | 15% | 15% | 14% |
|                                                                                                                                                                                                                                                                                                         | Atlantic | 9%   | 9%   | 9%   | 9%   | 13%  | 10%  | 10%  | 9%  | 9%  | 9%  |
| L-CH4, % of total R in top 50%                                                                                                                                                                                                                                                                          |          |      |      |      |      |      |      |      |     |     |     |
|                                                                                                                                                                                                                                                                                                         | Global   | 92%  | 94%  | 93%  | 94%  | 93%  | 94%  | 94%  | 94% | 94% | 94% |
|                                                                                                                                                                                                                                                                                                         | Pacific  | 89%  | 87%  | 86%  | 88%  | 86%  | 87%  | 87%  | 87% | 87% | 87% |
|                                                                                                                                                                                                                                                                                                         | Atlantic | 83%  | 83%  | 82%  | 84%  | 82%  | 83%  | 83%  | 84% | 84% | 83% |
| L-CH4, %of total R in top 10%                                                                                                                                                                                                                                                                           |          |      |      |      |      |      |      |      |     |     |     |
|                                                                                                                                                                                                                                                                                                         | Global   | 37%  | 39%  | 33%  | 40%  | 39%  | 41%  | 41%  | 41% | 41% | 39% |
|                                                                                                                                                                                                                                                                                                         | Pacific  | 35%  | 30%  | 26%  | 32%  | 30%  | 31%  | 31%  | 31% | 31% | 29% |
|                                                                                                                                                                                                                                                                                                         | Atlantic | 25%  | 23%  | 19%  | 23%  | 24%  | 24%  | 24%  | 24% | 24% | 24% |
| L-CH4, %of total R in top 3%                                                                                                                                                                                                                                                                            |          |      |      |      |      |      |      |      |     |     |     |
|                                                                                                                                                                                                                                                                                                         | Global   | 15%  | 15%  | 14%  | 15%  | 15%  | 16%  | 16%  | 16% | 16% | 16% |
|                                                                                                                                                                                                                                                                                                         | Pacific  | 15%  | 11%  | 10%  | 12%  | 11%  | 13%  | 12%  | 13% | 12% | 11% |
|                                                                                                                                                                                                                                                                                                         | Atlantic | 9%   | 8%   | 7%   | 8%   | 9%   | 9%   | 8%   | 8%  | 8%  | 8%  |
| Table S7c. Mean J-values                                                                                                                                                                                                                                                                                |          |      |      |      |      |      |      |      |     |     |     |
| J-O1D, mean, e-5 /s                                                                                                                                                                                                                                                                                     | F0AM     | GC   | GISS | GMI  | NCAR | UCI  | U15  | U97  |     |     |     |
| Global                                                                                                                                                                                                                                                                                                  | 1.18     | 0.87 | 1.29 | 0.93 | 1.00 | 0.91 | 0.91 | 0.91 |     |     |     |
| Pacific                                                                                                                                                                                                                                                                                                 | 1.48     | 1.34 | 1.95 | 1.42 | 1.47 | 1.40 | 1.39 | 1.40 |     |     |     |
| Atlantic                                                                                                                                                                                                                                                                                                | 1.44     | 1.33 | 1.76 | 1.42 | 1.56 | 1.42 | 1.42 | 1.43 |     |     |     |
| J-NO2, mean, e-3 /s                                                                                                                                                                                                                                                                                     |          |      |      |      |      |      |      |      |     |     |     |
| Global                                                                                                                                                                                                                                                                                                  | 4.32     | 3.60 | 4.69 | 3.62 | 3.81 | 3.97 | 3.99 | 3.97 |     |     |     |
| Pacific                                                                                                                                                                                                                                                                                                 | 4.84     | 4.67 | 5.75 | 4.62 | 4.86 | 5.13 | 5.09 | 5.11 |     |     |     |
| Atlantic                                                                                                                                                                                                                                                                                                | 4.89     | 4.84 | 5.66 | 4.82 | 5.00 | 5.40 | 5.40 | 5.42 |     |     |     |
| Global includes all ATom-1 parcels (32,383), Pacific considers all measurements (11,486) over the Pacific Ocean from 54°S to 60°N, and Atlantic uses parcels from 54°S to 60°N over the Atlantic basin (7,501). All parcels are weighted at described in the text, including a cosine(latitude) factor. |          |      |      |      |      |      |      |      |     |     |     |

592  
593

**Table S9.** Standard deviation across 5 separated days in August (% of mean reactivity or J-value) using MDS\_R0.

|      | P-O3 | L-O3 | L-CH4 | J-O1D | J-NO2 |
|------|------|------|-------|-------|-------|
| GC   | 11%  | 9%   | 10%   | 9%    | 9%    |
| GISS | 22%  | 14%  | 17%   | 14%   | 12%   |
| GMI  | 10%  | 9%   | 10%   | 10%   | 10%   |
| NCAR | 23%  | 32%  | 28%   | 17%   | 16%   |
| UCI  | 10%  | 10%  | 11%   | 10%   | 11%   |

594

595

## SI References

- Duncan, B.N., Logan, J.A., Bey, I., Megretskaia, I.A., Yantosca, R.M., Novelli, P.C., Jones, N.B. and Rinsland, C.P., 2007. Global budget of CO, 1988–1997: Source estimates and validation with a global model. *Journal of Geophysical Research: Atmospheres*, 112(D22).
- Gelaro, R., McCarty, W., Suárez, M.J., Todling, R., Molod, A., Takacs, L., Randles, C.A., Darmenov, A., Bosilovich, M.G., Reichle, R. and Wargan, K., 2017. The modern-era retrospective analysis for research and applications, version 2 (MERRA-2). *Journal of climate*, 30(14), pp.5419-5454.
- Holmes, C.D. and Prather, M.J., 2017. An atmospheric definition of the equator and its implications for atmospheric chemistry and climate. *Nature Geoscience*.
- Horowitz, L.W., Walters, S., Mauzerall, D.L., Emmons, L.K., Rasch, P.J., Granier, C., Tie, X., Lamarque, J.F., Schultz, M.G., Tyndall, G.S. and Orlando, J.J., 2003. A global simulation of tropospheric ozone and related tracers: Description and evaluation of MOZART, version 2. *Journal of geophysical research: Atmospheres*, 108(D24).
- Li, D., Zhang, R. and Knutson, T.R., 2017. On the discrepancy between observed and CMIP5 multi-model simulated Barents Sea winter sea ice decline. *Nature Communications*, 8(1), pp.1-7.
- Prather, M.J., Zhu, X., Flynn, C.M., Strode, S.A., Rodriguez, J.M., Steenrod, S.D., Liu, J., Lamarque, J.F., Fiore, A.M., Horowitz, L.W. and Mao, J., 2017. Global atmospheric chemistry—which air matters. *Atmospheric Chemistry and Physics*, 17(14), pp.9081-9102.
- Prather, M.J., Flynn, C.M., Zhu, X., Steenrod, S.D., Strode, S.A., Fiore, A.M., Correa, G., Murray, L.T. and Lamarque, J.F., 2018. How well can global chemistry models calculate the reactivity of short-lived greenhouse gases in the remote troposphere, knowing the chemical composition. *Atmospheric Measurement Techniques*, 11(5), pp.2653-2668.
- Rienecker, M.M., Suarez, M.J., Gelaro, R., Todling, R., Bacmeister, J., Liu, E., Bosilovich, M.G., Schubert, S.D., Takacs, L., Kim, G.K. and Bloom, S., 2011. MERRA: NASA's modern-era retrospective analysis for research and applications. *Journal of climate*, 24(14), pp.3624-3648.
- Strahan, S.E., Douglass, A.R. and Steenrod, S.D., 2016. Chemical and dynamical impacts of stratospheric sudden warmings on Arctic ozone variability. *Journal of Geophysical Research: Atmospheres*, 121(19), pp.11-836.
- Tilmes, S., Sanderson, B.M. and O'Neill, B.C., 2016. Climate impacts of geoengineering in a delayed mitigation scenario. *Geophysical Research Letters*, 43(15), pp.8222-8229.

642 Wofsy, S.C., Afshar, S., Allen, H.M., Apel, E.C., Asher, E.C., Barletta, B., Bent, J., Bian,  
643 H., Biggs, B.C., Blake, D.R. and Blake, N., 2018. ATom: Merged atmospheric chemistry,  
644 trace gases, and aerosols. ORNL DAAC Oak Ridge, Tennessee, USA.  
645  
646 Wolfe, G.M., Marvin, M.R., Roberts, S.J., Travis, K.R. and Liao, J., 2016. The  
647 framework for 0-D atmospheric modeling (F0AM) v3. 1. Geoscientific Model  
648 Development, 9(9), pp.3309-3319.
